# Supplementary material for: Dynamic changes in methadone utilisation for opioid use disorder treatment: a retrospective observational study during the COVID-19 pandemic
Source: PubMed Central journal article supplement — BMJ Open. 2023 Nov 16;13(11):e074845. doi: 10.1136/bmjopen-2023-074845 (PMC10661065; doi:10.1136/bmjopen-2023-074845), 2023-11-16
Supplement: bmjopen-2023-074845.draft_revisions.pdf [file bmjopen-2023-074845.draft_revisions.pdf]

# BMJ Open

BMJ Open is committed to open peer review. As part of this commitment we make the peer review history of every article we publish publicly available.

When an article is published we post the peer reviewers' comments and the authors' responses online. We also post the versions of the paper that were used during peer review. These are the versions that the peer review comments apply to.

The versions of the paper that follow are the versions that were submitted during the peer review process. They are not the versions of record or the final published versions. They should not be cited or distributed as the published version of this manuscript.

BMJ Open is an open access journal and the full, final, typeset and author-corrected version of record of the manuscript is available on our site with no access controls, subscription charges or pay-per-view fees (<http://bmjopen.bmj.com>).

If you have any questions on BMJ Open's open peer review process please email [info.bmjopen@bmj.com](mailto:info.bmjopen@bmj.com)

# BMJ Open

## Trends in Methadone Utilization for Opioid Use Disorder Treatment in the United States During the COVID-19 Pandemic

|                               |                                                                                                                                                                                                                                                                                                                                                                                                                                                                                                                                                                                                                                                                                                            |
|-------------------------------|------------------------------------------------------------------------------------------------------------------------------------------------------------------------------------------------------------------------------------------------------------------------------------------------------------------------------------------------------------------------------------------------------------------------------------------------------------------------------------------------------------------------------------------------------------------------------------------------------------------------------------------------------------------------------------------------------------|
| Journal:                      | <i>BMJ Open</i>                                                                                                                                                                                                                                                                                                                                                                                                                                                                                                                                                                                                                                                                                            |
| Manuscript ID                 | bmjopen-2023-074845                                                                                                                                                                                                                                                                                                                                                                                                                                                                                                                                                                                                                                                                                        |
| Article Type:                 | Original research                                                                                                                                                                                                                                                                                                                                                                                                                                                                                                                                                                                                                                                                                          |
| Date Submitted by the Author: | 19-Apr-2023                                                                                                                                                                                                                                                                                                                                                                                                                                                                                                                                                                                                                                                                                                |
| Complete List of Authors:     | Kennalley, Amy; Geisinger Commonwealth School of Medicine, Department of Medical Education<br>Fanelli, Jessica ; Geisinger Commonwealth School of Medicine, Department of Medical Education<br>Furst, John; Geisinger Commonwealth School of Medicine, Department of Medical Education<br>Mynarski, Nicholas; Geisinger Commonwealth School of Medicine, Department of Medical Education<br>Jarvis, Margaret; Geisinger Clinic<br>Nichols, Stephanie ; University of New England, Department of Pharmacy Practice<br>McCall, Kenneth L.; Binghamton University, Department of Pharmacy Practice<br>Piper, Brian J.; Geisinger Commonwealth School of Medicine; Center for Pharmacy Innovation and Outcomes |
| Keywords:                     | COVID-19, EPIDEMIOLOGY, Health Services Accessibility, Substance misuse < PSYCHIATRY, REHABILITATION MEDICINE                                                                                                                                                                                                                                                                                                                                                                                                                                                                                                                                                                                              |
|                               |                                                                                                                                                                                                                                                                                                                                                                                                                                                                                                                                                                                                                                                                                                            |

SCHOLARONE™  
Manuscripts

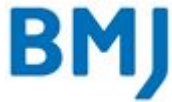

I, the Submitting Author has the right to grant and does grant on behalf of all authors of the Work (as defined in the below author licence), an exclusive licence and/or a non-exclusive licence for contributions from authors who are: i) UK Crown employees; ii) where BMJ has agreed a CC-BY licence shall apply, and/or iii) in accordance with the terms applicable for US Federal Government officers or employees acting as part of their official duties; on a worldwide, perpetual, irrevocable, royalty-free basis to BMJ Publishing Group Ltd ("BMJ") its licensees and where the relevant Journal is co-owned by BMJ to the co-owners of the Journal, to publish the Work in this journal and any other BMJ products and to exploit all rights, as set out in our [licence](#).

The Submitting Author accepts and understands that any supply made under these terms is made by BMJ to the Submitting Author unless you are acting as an employee on behalf of your employer or a postgraduate student of an affiliated institution which is paying any applicable article publishing charge ("APC") for Open Access articles. Where the Submitting Author wishes to make the Work available on an Open Access basis (and intends to pay the relevant APC), the terms of reuse of such Open Access shall be governed by a Creative Commons licence – details of these licences and which [Creative Commons](#) licence will apply to this Work are set out in our licence referred to above.

Other than as permitted in any relevant BMJ Author's Self Archiving Policies, I confirm this Work has not been accepted for publication elsewhere, is not being considered for publication elsewhere and does not duplicate material already published. I confirm all authors consent to publication of this Work and authorise the granting of this licence.

# Trends in Methadone Utilization for Opioid Use Disorder Treatment in the United States During the COVID-19 Pandemic

Amy L. Kennalley<sup>1,\*</sup>, Jessica L. Fanelli<sup>1</sup>, John A. Furst Jr.<sup>1</sup>, Nicholas J. Mynarski<sup>1</sup>, Margaret A. Jarvis<sup>2</sup>, Stephanie D. Nichols<sup>3</sup>, Kenneth L. McCall<sup>4</sup>, and Brian J. Piper<sup>1,5</sup>

<sup>1</sup>Department of Medical Education, Geisinger Commonwealth School of Medicine, Scranton, PA, 18510, <sup>2</sup>Geisinger Clinic, Danville, PA, 17821, <sup>3</sup>Department of Pharmacy Practice, University of New England, Portland, ME 04103, <sup>4</sup>Department of Pharmacy Practice, Binghamton University, Johnson City, NY 13790, <sup>5</sup>Center for Pharmacy Innovation and Outcomes, Danville, PA, 18704

\*Correspondence: Amy Kennalley

525 Pine St, Scranton, PA 18510

akennalley01@som.geisinger.edu

(925) 408-5226

Keywords: COVID-19, opioid treatment, drug use, medication assisted treatment, Medicaid

Abstract: 287 / 300 words

Manuscript: 3,814 words

## ORCID

ALK: 0000-0003-1845-7765

BJP: 0000-0002-2295-445X

SDN: 0000-0001-9035-5953

## Abstract

**Objectives:** Opioid use disorder (OUD) is a major public health concern in the United States (US), resulting in high rates of overdose and other negative outcomes. Methadone, an OUD treatment, has been shown to be effective in reducing the risk of overdose and improving overall health and quality of life. This study analyzed the distribution of methadone for the treatment of OUD across the US over the past decade and through COVID-19 pandemic.

**Design:** Retrospective observational study using secondary data analysis.

**Setting:** Data from the Drug Enforcement Administration's Automated Reports and Consolidated Ordering System, Medicaid's State Drug Utilization Data, and the US Census Bureau for 2010 to 2021.

**Participants:** All US Opioid Treatment Programs (OTPs).

**Primary and secondary outcome measures:** The primary outcomes were the overall pattern in methadone distribution and the number of OTPs in the US per year. The secondary outcome was Medicaid prescriptions for methadone.

**Results:** Methadone distribution for OUD has expanded significantly over the past decade, with an average state increase of +96.96% from 2010 to 2020. There was a significant increase in overall distribution of methadone to OTP from 2010 to 2020 (+61.00%,  $P \leq 0.001$ ) and from 2015 to 2020 (+26.22%,  $P < 0.001$ ). However, the distribution to OTPs did not significantly change from 2019 to 2021 (-5.15%,  $P = 0.491$ ). There was considerable state level variation in methadone prescribing to Medicaid patients with four states having no prescriptions.

**Conclusions:** There have been dynamic changes in methadone distribution for OUD. Furthermore, pronounced variation in methadone distribution among states were observed, with some states having no OTPs or Medicaid coverage. New policies are urgently needed to increase access to methadone treatment, address the opioid epidemic in the US, and reduce overdose deaths.

1  
2  
3 **Article Summary:** Strengths and limitations of this study  
4

- 5 • ARCOS provides novel data on distribution and distributors of methadone for  
6 OTPs over the past decade, pre- and post-COVID-19
- 7 • ARCOS reports methadone distribution by weight, not by patient count or  
8 prescriptions, and doesn't differentiate pharmacological formulations
- 9 • Incorporating Medicaid data compensates for the absence of patient level  
10 methadone data in ARCOS  
11  
12

13 **Funding Statement:** This research received no specific grant from any funding agency  
14 in the public, commercial or not-for-profit sectors.  
15

16 **Competing Interests Statement:** BJP is supported by the Health Resources Services  
17 Administration (D34HP31025), the Pennsylvania Academic Clinical Research Center,  
18 and was (until 12/31/2021) part of an osteoarthritis research team supported by Pfizer  
19 and Eli Lilly. The other authors have no disclosures.  
20  
21

22 **Data Sharing Statement:** Publicly available datasets were analyzed in this study. This  
23 data can be found here: [<https://www.deadiversion.usdoj.gov/arcos/>]  
24 [[https://www.medicaid.gov/medicaid/prescription-drugs/state-drug-utilization-](https://www.medicaid.gov/medicaid/prescription-drugs/state-drug-utilization-data/index.html)  
25 [data/index.html](https://www.medicaid.gov/medicaid/prescription-drugs/state-drug-utilization-data/index.html)].  
26  
27  
28  
29  
30  
31  
32  
33  
34  
35  
36  
37  
38  
39  
40  
41  
42  
43  
44  
45  
46  
47  
48  
49  
50  
51  
52  
53  
54  
55  
56  
57  
58  
59  
60

## Introduction

The United States (US) Food and Drug Administration (FDA) has approved methadone, buprenorphine, and naltrexone as treatments for Opioid Use Disorder (OUD) [1], but there have been several policy changes impacting OUD care during the COVID-19 pandemic. Methadone, a gold standard medication for OUD (MOUD), is a long-acting synthetic opioid administered via opioid treatment programs (OTP) [1-3]. In recent years, methadone take-home doses have been extended to 28 days for stable patients and 14 days for less stable patients, drug screening requirements have been relaxed, and telemedicine has been expanded for established patients [4, 5]. However, unlike for buprenorphine, starting methadone treatment requires an in-person visit. Prior to the pandemic, OUD methadone treatment also required the co-administration of counseling, however, these counseling requirements have also been relaxed as a result of the COVID-19 pandemic [5-7].

As an opioid, methadone has the potential to cause serious adverse effects including respiratory depression and cardiotoxicity [3, 8, 9]. An alternative gold standard MOUD, buprenorphine, has also raised safety concerns as well with rising respiratory depression fatalities after oral doses in both adult and pediatric patients, resulting in a total of 84 deaths from 2003–2019 [10]. In contrast, in 2021 alone, there were 106,699 overdose deaths in the US. Thus, it is important to weigh these potential concerns against the extremely high risk of respiratory depression associated with ongoing nonprescribed opioid use, a symptom of under or untreated OUD, and not withhold first line care unnecessarily. In regions where it is available, methadone is frequently used to treat the most severely ill OUD patients since it is a full mu receptor agonist and doses can be titrated up as needed, while buprenorphine is a partial mu receptor agonist with less higher end dosing flexibility. Methadone necessitates expert handling, especially in the early stages of treatment because of its full agonism properties combined with high lipophilicity, long serum half-life, and active metabolites [11]. Buprenorphine combined with naloxone may be becoming a more commonly prescribed option compared to methadone. A recent survey revealed 75% of emergency room physicians had a preference for buprenorphine over methadone [12]. However, buprenorphine was widely but inequitably unavailable from 2004 to 2015 due to factors such as systemic racism and discrimination based on socioeconomic status. In particular, Black patients had a lower probability of receiving a prescription [13]. Findings from a retrospective, cohort study from 1998 to 2014 suggest that patients on buprenorphine had a lower risk of drug-related poisoning mortality during treatment compared to those on methadone [14]. In contrast, treatment with methadone was superior to buprenorphine in reducing criminal activity, HIV infection, hepatitis, and overall mortality [2, 15-18]. Additionally, a Cochrane meta-analysis concluded that methadone was superior to buprenorphine in retaining patients in treatment only if buprenorphine doses were 7mg per day or lower, but that methadone and buprenorphine were equivalent at higher doses (Supplemental Table 1) [19]. However, there is a nationwide lack of appropriate treatment with all potential medications for persons with OUD [20, 21]. Although studies have shown that

1  
2  
3 both treatments are effective, clinicians and patients should choose between  
4 buprenorphine and methadone treatment depending on their individual needs and  
5 circumstances, including the accessibility and availability of treatment programs in their  
6 area [2, 14-21].  
7

8  
9 There have been over one-million drug overdoses in the US since the start of the  
10 opioid epidemic [22]. The COVID-19 pandemic has placed tremendous stress on the  
11 healthcare system including the access to providers and availability of OUD treatments.  
12 Between 2019 and 2020, there was a +48.8% increase in overdose mortality among  
13 Black people, compared to +26.3% among White people [23]. Moreover, from April  
14 2020 to April 2021, the number of drug overdoses in the US exceeded one-hundred  
15 thousand, a +28.5% increase over the previous year [24]. With a +60% rise in  
16 overdoses compared to the previous year, May 2020 became the deadliest month on  
17 record [25]. A cross-sectional study, conducted from May to June 2020 in the US and  
18 Canada, found that new patients wishing to initiate methadone treatment were faced  
19 with a barrier in 20% of clinics [26]. Similarly, prior to the pandemic, both methadone  
20 and buprenorphine-based OTPs were found to be effective in US jails and prisons.  
21 However, following the pandemic, some of these OTPs have been expanded while  
22 others were discontinued [27-29].  
23  
24  
25  
26

27 This study obtained data from the Drug Enforcement Administration's (DEA)  
28 Automated Reports and Consolidated Ordering System (ARCOS), a federal program  
29 established by the 1970 Controlled Substances Act, to monitor the distribution of DEA  
30 controlled substances from various sources including retail pharmacies, hospitals,  
31 practitioners, teaching institutions, mid-level practitioners, and OTPs. Previous  
32 pharmacoepidemiologic studies have also utilized the ARCOS database [30-34]. It is  
33 important to note that ARCOS does not provide information on the number of patients  
34 receiving methadone. This caveat is important because it prevents an accurate  
35 representation of the amount of methadone used for each OUD patient. However,  
36 federally funded OTPs record number of patients receiving treatment, which could be a  
37 useful resource in understanding the true scale of the OUD epidemic in the US and the  
38 effectiveness of treatment efforts. The Substance Abuse Mental Health Services  
39 Administration's (SAMHSA) National Survey of Substance Abuse Treatment Services'  
40 (N-SSATS) annual report provides national data regarding alcohol and drug abuse  
41 facilities [35]. The number of patients receiving methadone for OUD decreased by  
42 almost one-quarter (-23.7%) from 2019 (408,550) to 2020 (311,531) [35] (Supplemental  
43 Figure 1).  
44  
45  
46  
47  
48

49 In addition to ARCOS, Medicaid's State Drug Utilization Data (SDUD) database  
50 was used in this study [36]. Medicaid is a program at the federal and state level which  
51 functions to aid in covering healthcare costs for patients with limited resources [37].  
52 Medicaid.gov publishes all prescription drugs covered by Medicaid every year for all 50  
53 states and the District of Columbia (DC) in the SDUD database. The State Health  
54 Official Letter, released on December 30, 2020, states that the SUPPORT Act of 2018  
55  
56  
57  
58  
59



1  
2  
3 mandates the inclusion of Medicaid coverage for MOUD for all eligible patients with  
4 OUD. Subsequently, the Continuing Appropriations Act of 2021, which added to the  
5 SUPPORT Act, requires rebates on methadone and other MOUD starting from October  
6 1, 2020 to September 30, 2025. [38, 39]. The use of both ARCOS and SDUD databases  
7 provide a comprehensive picture of the distribution and utilization of methadone for the  
8 OUD treatment over the past decade. Together, it is critical to examine the changes in  
9 methadone distribution during the COVID-19 pandemic and determine whether there  
10 are national or regional barriers to access this evidence-based pharmacotherapy.  
11  
12  
13  
14  
15  
16  
17  
18  
19  
20  
21  
22  
23  
24  
25  
26  
27  
28  
29  
30  
31  
32  
33  
34  
35  
36  
37  
38  
39  
40  
41  
42  
43  
44  
45  
46  
47  
48  
49  
50  
51  
52  
53  
54  
55  
56  
57  
58  
59  
60

## Materials and Methods

The quantities of methadone distributed (in grams) were obtained from the ARCOS yearly drug summary reports for 2010, 2015, 2019, 2020 and 2021. Methadone distributed to OTPs was classified as an OUD treatment. The number of OTPs per state were also obtained from ARCOS for 2010, 2015, 2019, 2020 and 2021. The state population estimates, including DC, were derived from the US Census Bureau's Annual Estimates of the Resident Population for the US [40]. The US Territories were examined elsewhere and were not included in Figures 1-5 [41]. Data was collected for methadone covered by Medicaid in 2020 for all 50 states and DC using a filtered download from the SDUD [36]. National Drug Codes (NDC) of formulations that are primarily used for OUD are provided in the Supplemental Table 2. The number of methadone prescriptions per state was divided by the number of Medicaid enrollees per state in 2020. Three states—Virginia, Montana, and Iowa were excluded from the results due to being outliers (10-112K prescriptions/100K enrollees) which presumably reflected a Medicaid data error (mean 475.4 prescriptions/100K enrollees for the remaining 48 states). This study was approved by the institutional review boards of the University of New England and Geisinger.

The percent change in methadone distribution for OUD was compared between states for time spans of ten years, five years and one year respectively. Data were analyzed through one-way repeated measures ANOVA with Sidak corrections to examine the effects of OTPs per one million persons per state on 2010, 2015, 2020, 2021. Data were similarly to examine the effects of mg of methadone per person per state on 2010, 2015, 2019, 2020, and 2021. Heatmaps created using JMP version 16.2.0. Figures and data analysis completed using Microsoft Excel, GraphPad Prism version 9.4.0, and Systat version 13.1.

## Results

### ARCOS

Overall, the total volume of methadone distributed to OTPs in the US increased over the last decade from 8.62 metric tons in 2010 to 10.88 tons in 2015 (+26.3%), and to 13.03 tons in 2020 (+19.7%), reflecting an increase in distribution to the majority of states. Results of the one-way repeated measures ANOVA revealed a significant main effect of time on mg of methadone per person per state ( $F(4, 200)=24.535$ ,  $P < 0.001$ ). Specifically, the average percent change in state distribution of methadone for OUD from 2010 to 2020 significantly increased by +96.96% (SD=146.64%, Sidak post hoc  $P < 0.001$ ), with forty-three states showing an increase, five states a decrease, and three states showing no change. There was also a significant increase in mg of methadone per person per state (+61.8%) from 2010 to 2019 ( $P < 0.001$ ) and by +61.0% from 2010 to 2020 ( $P < 0.001$ ). From 2010 to 2020, there was a large ( $> 1.5$  SDs) increase in Vermont (+353.67%), and significant elevations ( $> 1.96$  SDs,  $P < 0.05$ ) in Alaska (+421.11%) and Montana (+897.02%) relative to the average (Figure 1).

Examination of 2015 relative to 2020 revealed the national average distribution for OUD increased significantly by +26.22% (SD = 50.38%,  $P < 0.001$ ), with thirty-eight states increasing but eleven states decreasing. There were significant increases ( $P < 0.05$ ) in Alaska (+135.34%) and Mississippi (+311.48%) relative to the national mean (Figure 2).

However, based on a one-way repeated measures ANOVA with Sidak post hoc from 2019 to 2020 (i.e., pre- to post- COVID-19 pandemic), the distribution of methadone was stable (-0.091%, SD = 10.81%). Slightly over half (twenty-eight) of states showed an increase and twenty-two states exhibited a decrease. No significant ( $P = 1.000$ ) differences were found between 2019 and 2020. Examination of specific states revealed an increase in Kentucky (+18.68%) and a significant increase ( $P < 0.05$ ) in Ohio (+26.02%) relative to the national mean. In contrast, there were appreciable decreases in Nebraska (-16.6%), South Dakota (-17.27%), and Mississippi (-20.53%), and significant decreases ( $P < 0.05$ ) in Alabama (-21.96%), New Hampshire (-24.13%) and Florida (-28.97%) relative to the national mean (Figure 3).

Examination of 2019 to 2021, a wider pre- to post COVID-19 pandemic timeline, the distribution of methadone to OTPs showed a decline (-5.15%, SD = 19.14%), but no significant difference ( $P = 0.491$ ). Eighteen states showed an increase while thirty-one states showed a decrease. Ohio (+47.53%) had a significant increase ( $P < 0.05$ ) relative to the national mean. In contrast, there was an appreciable decrease in Mississippi (-42.53%), and significant decreases ( $P < 0.05$ ) in Alabama (-44.27%), Nebraska (-47.96%), New Hampshire (-52.99%) and Florida (-54.61%) relative to the national mean (Figure 4). However, distribution in 2021 was -5.69% lower than 2019 and -5.71% lower than 2020 (Supplemental Figure 2A).

1  
2  
3 The average methadone distribution in the US for OUD was 43.75 mg/person  
4 (SD = 35.01) in 2021. There was significantly elevated methadone distributed in Rhode  
5 Island (155.13 mg/person), Delaware (147.27 mg/person), Connecticut (126.66  
6 mg/person), and Vermont (125.06 mg/person) relative to the national mean (43.75,  $P <$   
7 0.05).  
8  
9

10 The total number of OTPs distributing methadone in the US increased +18.6%  
11 from 2010 (1,139) to 2015 (1,351) and peaked in 2021 (1,738, Supplemental Figure  
12 2B). In comparison, the number of pharmacies distributing buprenorphine (49,041) was  
13 43.1-fold greater than OTPs distributing methadone in 2010. However, this ratio  
14 decreased to 33.3-fold in 2021. Results of the repeated measures ANOVA revealed a  
15 significant interaction between time and OTPs per one million persons per state ( $F(3,$   
16  $150)=38.067$ ,  $P < 0.000$ ). The number of OTPs per one million persons per state  
17 significantly increased ( $P < 0.0001$ ) from 2010 to 2021. In addition, one-way repeated  
18 measures ANOVA with Sidak post hoc revealed 2010 to 2015 ( $P < 0.0001$ ), 2010 to  
19 2020 ( $P < 0.0001$ ), 2015 to 2020 ( $P < 0.0001$ ), and 2015 to 2021 ( $P < 0.0001$ ) were  
20 each significantly different. The number of OTPs per 1 million persons per state in 2020  
21 relative to 2021 did not significantly increase ( $P = 0.683$ ). Twenty states had fewer  
22 OTPs in 2021 relative to 2010, 2015, or 2020 (Alabama, Florida, Georgia, Maine,  
23 Maryland, Minnesota, Mississippi, Montana, Nebraska, New Hampshire, New Mexico,  
24 New York, North Carolina, Oklahoma, South Carolina, South Dakota, Texas, Utah,  
25 Vermont, and Washington). One state (Wyoming) did not have a single OTP (Figure 5,  
26 Supplemental Table 3).  
27  
28  
29  
30  
31

### 32 *Medicaid*

33  
34 The SDUD database showed considerable variation in methadone prescribing  
35 between states and regions for patients covered under Medicaid (mean = 475.39, SD =  
36 1097.78 with four states having values of 0). The top four states (Wisconsin,  
37 Tennessee, Oregon, and Vermont) accounted for 64.03% of all methadone covered by  
38 Medicaid in 2020 (Supplemental Figure 3).  
39  
40  
41  
42  
43  
44  
45  
46  
47  
48  
49  
50  
51  
52  
53  
54  
55  
56  
57  
58  
59  
60

## Discussion

The key finding of this study was that the pronounced and significant increase in methadone distribution to OTPs for OUD over the past decade has reversed with non-significant decreases (-0.09%) from 2019 to 2020 and (-5.15%) from 2019 to 2021. There were significant increases in the number of OTPs per one million persons per state over the past decade, but no significant increases over the COVID-19 pandemic period from 2019 compared to 2021 [28]. These findings point to the necessity for more OTPs to combat the escalating OUD problem with this evidence-based pharmacotherapy [7]. Twenty states showed a reduction in OTPs from 2010 to 2021 which could be due to funding issues or policies for OTPs in these states [42].

Examination of how the COVID-19 pandemic affected OUD treatment from 2019 to 2021 revealed that methadone distribution to OTPs did not increase significantly. However, a subtle but statistically significant increase (+5.0%) was observed in the number of poison control reports of intentional methadone exposure during this period [43]. In addition, the National Center for Health Statistics (NCHS) of the Centers for Disease Control and Prevention (CDC) reported that drug overdose mortality increased by +31% between 2019 and 2020. Nonetheless, the rate of methadone overdose deaths remained low with no significant increase in this report, suggesting no change in nonprescribed methadone use during the COVID-19 pandemic [44]. However, others have reached the opposite conclusion [9]. Since OTPs were not distributing additional methadone MMEs during the COVID-19 pandemic, and overdose rates continue to surge, this emphasizes the need for expanded access to methadone treatment and reduced treatment barriers. Individuals who overdose may be prime candidates for methadone treatment. Additional solutions can include allowing for earlier access to take home methadone from OTPs and allowing for patients to obtain methadone prescriptions from community pharmacies after a period of OUD stability, which is currently prohibited by law outside of an OTP [45]. Another uncommonly employed solution is to provide travelling methadone treatment on a daily route which can allow observed administration and decrease need for transportation to a further location [46]. This would be particularly beneficial for rural areas.

Despite methadone being an evidence-based treatment for OUD which is superior to buprenorphine for patient retention [7], only forty-one states in 2018 had methadone covered under Medicaid [47]. Twelve states located predominantly in the South and Midwest opted to not expand Medicaid, leaving patients in these areas vulnerable to inaccessible treatment for OUD and for pain [48, 49]. States where methadone was not covered included: Arkansas, Idaho, Kansas, Kentucky, Louisiana, Nebraska, North Dakota, South Carolina, Tennessee, and Wyoming [47]. It was also found that only four states with 5.40% of the US population, accounted for the preponderance (64.03%) of prescriptions. This pronounced disparity indicates that patients in certain states and regions have appreciably better access to this evidence-based treatment for OUD than others [2]. Moving forward, improvements in access to

1  
2  
3 methadone prescriptions and clinics for Medicaid patients need to be expanded in order  
4 to equalize treatment options for this large, but vulnerable, population. Having coverage  
5 for methadone under Medicaid in all fifty states will help combat the escalating opioid  
6 epidemic by expanding treatment of substance use disorder (SUD) and OUD [47]. In  
7 addition, there is also a need for grant funding request for proposals to specifically focus  
8 on programs aimed at increasing access to methadone, particularly in rural areas [51].  
9

10  
11 This study suggests the importance of policy change as there is a pressing need  
12 for additional access to OUD therapy, specifically methadone treatment, in the US. Over  
13 400,000 people in the US received methadone from an OTP pre-pandemic, 2019, with  
14 over 90% located in urban areas, making it challenging for rural patients to make the  
15 daily trip to receive their medication [50, 51, 52]. SAMHSA released guidelines in March  
16 2020 allowing the regulatory authorities of all states to request blanket exceptions to  
17 allow OTP patients to take home doses of methadone and buprenorphine [53]. These  
18 guidelines were extended in November 2021. However, the number of patients  
19 receiving methadone declined in the first year of the COVID-19 pandemic by one-  
20 quarter [35]. Many providers and public health researchers are calling for these take  
21 home dosage rules to be continued post-pandemic [54, 55], although others that  
22 evaluated the number of overdoses involving methadone are more cautious [9, 56]. The  
23 number of pharmacies which dispensed buprenorphine was 34-fold greater in 2021 than  
24 the number of OTPs that dispensed methadone, indicating that buprenorphine is more  
25 easily accessible and available than methadone. On the other hand, the volume of  
26 methadone distributed by weight from OTPs was 2.4-fold higher than buprenorphine  
27 from pharmacies, hospitals, and OTPs combined, (Supplemental Table 1). It is currently  
28 curious that there are more restrictions in the US for prescribing methadone than for  
29 other Schedule II substances like fentanyl or oxycodone. Overcoming the “Not in my  
30 Backyard” (NIMBY) stigma surrounding OTPs is not a trivial undertaking and is  
31 exacerbated by a common lack of understanding of OUD as a chronic disease [41]. It  
32 will require a paradigm shift to allow supervised administration in pharmacies, primary  
33 care offices, mobile units as are common in other Western nations, and even video  
34 observed therapy [15, 26, 57, 58]. Expanding the role of specialty trained pharmacists  
35 by expanding the MOUD regulations to allow provider-delegated induction with  
36 buprenorphine in pharmacies, can immediately increase access to MOUD [57-61].  
37 According to the Consolidated Appropriations Act, 2023, which was passed on  
38 December 29, 2022, medical providers with a current DEA registration number are now  
39 able to prescribe buprenorphine for OUD without needing an X-DEA waiver if state law  
40 permits it [62]. Overall, this is important because it aims to remove existing barriers to  
41 OUD treatment and increase access to care for individuals who need it.  
42  
43  
44  
45  
46  
47  
48  
49

50 During the pandemic, daily visits to a methadone clinic were considered to be a  
51 health hazard and regulations governing the clinical work of methadone clinics were  
52 changed. Nonetheless, methadone remains more challenging for patients to access on  
53 many counts. Additionally, the regulatory burden surrounding methadone maintenance  
54 means that creating clinics requires substantially more time, money and effort than even  
55  
56  
57  
58  
59

1  
2  
3 specialty addiction medicine clinics where buprenorphine can be prescribed. This  
4 means that there will always be fewer methadone clinics than buprenorphine  
5 prescribers. This difference between the two medications may account for some of the  
6 change in methadone use described in this article. With the removal of the X-DEA  
7 waiver requirement for buprenorphine prescription, and the expansion of the exception  
8 to the Ryan Haight law [63] which governs prescribing scheduled drugs over  
9 telemedicine, it is reasonable to expect that an increasing proportion of people who  
10 have OUD will receive buprenorphine rather than methadone. That being said, despite  
11 lack of robust head to head trials [7], methadone has long been considered to have  
12 utility when other MOUDs have been ineffective, and is recommended for patients who  
13 cannot tolerate initiation or ongoing treatment with buprenorphine. Thus, there remains  
14 a strong need for wide and equitable methadone availability during this ever-worsening  
15 opioid crisis [64].  
16  
17  
18  
19

20 The strengths of this report include novel and timely data from ARCOS which is  
21 comprehensive for both distribution and number of distributors. This investigation  
22 extends upon earlier research both pre [4] and post COVID-19 pandemic [33, 34].  
23 Potential caveats and limitations stem from the fact that methadone distribution is  
24 reported in ARCOS by weight rather than prescriptions per individual at an OTP. It is  
25 notable that ARCOS reporting does not differentiate between pharmacological  
26 formulations. Further, this pharmacoepidemiological report does not contain detailed  
27 patient-level information including medical comorbidities or social determinants of  
28 health. These contributions should be further explored in future investigations with  
29 electronic medical records. Because SAMHSA's N-SSATS annual reports contain data  
30 on the total number of patients receiving methadone at OTPs, they could complement  
31 the ARCOS data and allow for a more detailed analysis of opioid prescribing patterns  
32 and patient outcomes (Supplemental Figure 1) [35]. Importantly, other  
33 pharmacoepidemiological research that compared another Schedule II substance from  
34 ARCOS to a state Prescription Drug Monitoring Program identified a high  
35 correspondence ( $r = +.985$ ) [32]. The inclusion of Medicaid data also, at least partially,  
36 offsets this concern. The paucity of methadone OTPs across rural states like Wyoming  
37 (253k km<sup>2</sup>), South Dakota (200k km<sup>2</sup>), and Nebraska (200 km<sup>2</sup>) is an important finding.  
38 However, prior research found that another rural state, Maine, which ranked tenth in the  
39 US, had three-OTPs in a single thirty-thousand-person city (Bangor) and none in other  
40 areas in northern Maine [51]. The non-homogenous distribution within states should  
41 also be a concern for policy makers. Providing funding opportunities to train Addiction  
42 Medicine Fellows who will focus on rural care post-graduation can result in a pipeline of  
43 addiction medicine leaders to many areas of the US which are most in need. The  
44 ARCOS database has limitations such as lack of differentiation between  
45 pharmacological formulations and absence of patient-level information which suggests  
46 the need for future investigations. Future research should also be focused on  
47 determining which patient subgroups were most impacted by the reversal in methadone  
48 distribution. As the number of pharmacies nationally distributing buprenorphine  
49 decreased (-4.7%) from 2019 to 2021, further research should evaluate if both  
50  
51  
52  
53  
54  
55  
56  
57  
58  
59  
60

1  
2  
3 methadone and buprenorphine continue to be underutilized in the post-COVID-19  
4 pandemic period [65] (Supplemental Table 1).  
5  
6  
7  
8  
9  
10  
11  
12  
13  
14  
15  
16  
17  
18  
19  
20  
21  
22  
23  
24  
25  
26  
27  
28  
29  
30  
31  
32  
33  
34  
35  
36  
37  
38  
39  
40  
41  
42  
43  
44  
45  
46  
47  
48  
49  
50  
51  
52  
53  
54  
55  
56  
57  
58  
59  
60



## Conclusions

In conclusion, this study highlights the trend over the past decade of methadone distribution for OUD in the US and disparities in access to OTPs in rural and western states. The findings of this study have the potential to guide improvements in OUD treatment policies at the state level, by providing valuable information on disparities in access to OTPs that could lead to the implementation of more permanent solutions. The many policy accommodations to COVID-19 may present an important opportunity to determine which factors most impact the accessibility, adherence, safety, and efficacy of methadone. Policy solutions that increase access to MOUD are urgently needed in order to continue to address the ongoing opioid epidemic.

## Figure Captions

**Figure 1.** Percent change from 2010 to 2020 in methadone distribution as reported by the Drug Enforcement Administration's Automated Reports and Consolidated Ordering System for Opioid Use Disorder. Percent change between 1.5 SDs and 1.959 SDs from the mean (+96.96%, SD = 146.64%), indicated with a #. Percent change  $> \pm 1.96$  SD from the mean was considered significant (\*P < 0.05).

**Figure 2.** Percent change from 2015 to 2020 in methadone distribution as reported by the Drug Enforcement Administration's Automated Reports and Consolidated Ordering System for Opioid Use Disorder. Percent change between 1.5 SDs and 1.959 SDs from the mean (+26.22%, SD = 50.38%), indicated with a #. Percent change  $> \pm 1.96$  SD from the mean was considered significant (\*P < 0.05).

**Figure 3.** Percent change from 2019 to 2020 in methadone distribution as reported by the Drug Enforcement Administration's Automated Reports and Consolidated Ordering System for Opioid Use Disorder. Percent change between 1.5 SDs and 1.959 SDs from the mean (-0.09%, SD 10.81), indicated with a #. Percent change  $> \pm 1.96$  SD from the mean was considered significant (\*P < 0.05).

**Figure 4.** Percent change from 2019 to 2021 in methadone distribution as reported by the Drug Enforcement Administration's Automated Reports and Consolidated Ordering System for Opioid Use Disorder. Percent change between 1.5 SDs and 1.959 SDs from the mean (-5.15%, SD 19.14), indicated with a #. Percent change  $> \pm 1.96$  SD from the mean was considered significant (\*P < 0.05).

**Figure 5.** Number of opioid treatment programs per 1 million persons per state all significantly (P < 0.0001) different from 2010, 2015, 2020 and 2021. The twenty states that decreased in 2021 relative to 2010, 2015 or 2020 are indicated with a "d". DC: District of Columbia.

## Supplemental Materials

**Supplemental Figure 1.** Number of patients receiving methadone for opioid use disorder in the United States per year as reported by Substance Abuse and Mental Health Services Administration's National Survey of Substance Abuse Treatment Services data. The years 2014 and 2018 were not available and were omitted.

**Supplemental Figure 2.** Distribution in kg (A) and number of buyers and registrants (B) in Opioid Treatment Programs (OTP) and pharmacies (pharm, buprenorphine only) for methadone and buprenorphine as reported to the United States Drug Enforcement Administration's Automated Reports and Consolidated Orders system for the fifty states, Washington DC, and the US Territories. Methadone in 2021 (12.4 metric tons) was 5.69% lower than 2019 (13.1 metric tons) and 5.71% below 2020 (13.1 metric tons). Methadone by weight was 2.49-fold greater than buprenorphine from pharmacies and OTPs in 2021. The number of pharmacies distributing buprenorphine was 33.3 to 47.3-fold greater than the number of OTPs distributing methadone from 2010 to 2021.

**Supplemental Figure 3.** Methadone prescriptions, per 100K Medicaid patients, for 48 US states, and Washington DC.

**Supplemental Table 1.** Comparison of the pharmacological and therapeutic properties of methadone and buprenorphine.

|                                       | <b>Methadone</b>                          | <b>Buprenorphine</b>                                                          |
|---------------------------------------|-------------------------------------------|-------------------------------------------------------------------------------|
| Year developed                        | 1937                                      | 1969                                                                          |
| Opioid receptor activity              | mu full-agonist                           | mu partial agonist                                                            |
| Other mechanism(s)                    | NMDA antagonist                           | non-selective for other opioid receptors                                      |
| Potency (x morphine)                  | 8 – 12                                    | 10                                                                            |
| Metabolism                            | CYP2D6, CYP3A4                            | CYP3A4                                                                        |
| Active metabolite(s)                  | none                                      | norbuprenorphine                                                              |
| Half-life                             | 8 – 59 hours for oral                     | 24 – 48 hours for buccal                                                      |
| Formulation                           | mono                                      | mono or combination with naloxone                                             |
| Present in breast milk                | yes, < 3% maternal dose                   | yes, < 1% maternal dose                                                       |
| Availability (US)                     | narcotic treatment programs               | providers with an X-waiver                                                    |
| Schedule (US)                         | II                                        | III                                                                           |
| Crowdsourcing (price/mg)              | \$0.96                                    | \$2.13                                                                        |
| Black box warnings                    | addiction, abuse, misuse, QT prolongation | addiction, abuse, misuse <sup>1</sup> , child exposure can result in overdose |
| Opioid rank                           | #1                                        | #4                                                                            |
| 2021 Distribution (US)                | 12.4 metric tons <sup>3</sup>             | 5.2 metric tons <sup>4</sup>                                                  |
| WHO Essential Medication <sup>2</sup> | yes                                       | yes                                                                           |

<sup>1</sup>buccal formulation; <sup>2</sup>complimentary; <sup>3</sup>Opioid Treatment Programs (OTP); <sup>4</sup>total of pharmacies, hospitals, and OTP.

**Supplementary Table 2.** Medicaid's State Drug Utilization Data reported National Drug Codes (NDC) for methadone prescribed for opioid use disorder.

| <b>NDC</b> |
|------------|
| 54039168   |
| 54039268   |
| 54355344   |
| 54355563   |
| 54421825   |
| 54421925   |
| 54453825   |

1  
2  
3  
4  
5  
6  
7  
8  
9  
10  
11  
12  
13  
14  
15  
16  
17  
18  
19  
20  
21  
22  
23  
24  
25  
26  
27  
28  
29  
30  
31  
32  
33  
34  
35  
36  
37  
38  
39  
40  
41  
42  
43  
44  
45  
46  
47  
48  
49  
50  
51  
52  
53  
54  
55  
56  
57  
58  
59  
60

54457025

54457125

54855324

54855424

406052710

406054034

406254001

406575501

406575523

406575562

406577101

406577123

406577162

406872510

904653061

13107000000

17478000000

31722000000

42806000000

60687000000

63739000000

66689000000

67457000000

67877000000

68084000000

68462000000

---

**Supplemental Table 3.** Opioid treatment programs as reported to the Drug Enforcement Administration's Automated Reports and Consolidated Orders System per one million persons.

| State              | 2010 | 2015 | 2020 | 2021 |
|--------------------|------|------|------|------|
| 1. Rhode Island    | 16.1 | 16.1 | 21.0 | 24.6 |
| 2. Delaware        | 6.7  | 10.6 | 14.1 | 17.9 |
| 3. Maryland        | 9.9  | 11.4 | 14.4 | 14.3 |
| 4. Connecticut     | 10.1 | 10.3 | 11.9 | 14.1 |
| 5. Massachusetts   | 7.9  | 9.1  | 12.1 | 13.7 |
| 6. Vermont         | 11.2 | 14.4 | 12.4 | 12.4 |
| 7. New Mexico      | 4.8  | 6.7  | 11.3 | 9.5  |
| 8. Arizona         | 5.0  | 5.7  | 9.2  | 9.3  |
| 9. DC              | 8.3  | 5.9  | 7.3  | 9.0  |
| 10. Alaska         | 2.8  | 5.4  | 5.5  | 8.2  |
| 11. Maine          | 6.8  | 9.0  | 7.3  | 7.3  |
| 12. Illinois       | 5.1  | 5.6  | 7.2  | 7.2  |
| 13. Pennsylvania   | 5.4  | 5.8  | 6.9  | 7.0  |
| 14. Georgia        | 4.7  | 6.3  | 7.0  | 6.7  |
| 15. Kentucky       | 3.0  | 3.4  | 6.2  | 6.4  |
| 16. North Carolina | 3.8  | 5.1  | 7.9  | 6.4  |
| 17. Iowa           | 1.3  | 2.2  | 5.6  | 6.0  |
| 18. New York       | 5.7  | 5.3  | 6.0  | 5.8  |
| 19. New Hampshire  | 4.6  | 6.0  | 7.3  | 5.8  |
| 20. Ohio           | 1.5  | 1.8  | 4.8  | 5.5  |
| 21. Oregon         | 3.4  | 3.7  | 5.2  | 5.4  |
| 22. Nevada         | 4.4  | 4.5  | 5.2  | 5.4  |
| 23. Utah           | 3.6  | 4.4  | 5.5  | 5.1  |
| 24. West Virginia  | 4.9  | 4.9  | 5.0  | 5.0  |
| 25. Oklahoma       | 3.7  | 3.6  | 5.3  | 5.0  |
| 26. Colorado       | 2.2  | 2.6  | 4.9  | 5.0  |
| 27. Michigan       | 3.3  | 4.3  | 4.5  | 4.8  |
| 28. New Jersey     | 0.11 | 3.7  | 4.7  | 4.7  |
| 29. Virginia       | 2.1  | 3.6  | 4.5  | 4.7  |
| 30. South Carolina | 1.9  | 3.7  | 4.7  | 4.6  |
| 31. California     | 3.8  | 3.8  | 4.0  | 4.2  |
| 32. North Dakota   | 0.0  | 0.0  | 3.8  | 3.9  |
| 33. Wisconsin      | 2.3  | 3.0  | 3.7  | 3.7  |
| 34. Montana        | 2.0  | 2.9  | 3.7  | 3.6  |
| 35. Indiana        | 2.2  | 2.1  | 3.4  | 3.5  |
| 36. Washington     | 3.0  | 3.0  | 3.9  | 3.5  |
| 37. Alabama        | 2.9  | 4.5  | 4.6  | 3.2  |
| 38. Texas          | 3.3  | 3.2  | 3.3  | 3.1  |
| 39. Kansas         | 2.5  | 3.1  | 3.1  | 3.1  |
| 40. Minnesota      | 1.5  | 3.3  | 2.8  | 3.0  |
| 41. Missouri       | 1.7  | 2.5  | 2.6  | 2.9  |

|    |                  |            |            |            |            |
|----|------------------|------------|------------|------------|------------|
| 1  |                  |            |            |            |            |
| 2  |                  |            |            |            |            |
| 3  | 42. Tennessee    | 1.9        | 1.8        | 2.3        | 2.9        |
| 4  | 43. Louisiana    | 1.8        | 2.1        | 2.2        | 2.8        |
| 5  | 44. Hawaii       | 2.9        | 2.8        | 2.8        | 2.8        |
| 6  | 45. Florida      | 1.3        | 2.6        | 2.9        | 2.5        |
| 7  | 46. Idaho        | 1.9        | 1.8        | 2.2        | 2.1        |
| 8  | 47. Arkansas     | 1.0        | 2.0        | 2.0        | 2.0        |
| 9  | 48. South Dakota | 0.0        | 1.2        | 1.1        | 1.1        |
| 10 | 49. Nebraska     | 1.6        | 1.6        | 1.5        | 1.0        |
| 11 | 50. Mississippi  | 0.3        | 0.3        | 1.7        | 1.0        |
| 12 | 51. Wyoming      | 0.0        | 0.0        | 0.0        | 0.0        |
| 13 |                  |            |            |            |            |
| 14 |                  |            |            |            |            |
| 15 | <b>Mean</b>      | <b>3.8</b> | <b>4.6</b> | <b>5.7</b> | <b>5.9</b> |
| 16 | <b>SEM</b>       | <b>0.4</b> | <b>0.5</b> | <b>0.6</b> | <b>0.6</b> |
| 17 |                  |            |            |            |            |
| 18 |                  |            |            |            |            |
| 19 |                  |            |            |            |            |
| 20 |                  |            |            |            |            |
| 21 |                  |            |            |            |            |
| 22 |                  |            |            |            |            |
| 23 |                  |            |            |            |            |
| 24 |                  |            |            |            |            |
| 25 |                  |            |            |            |            |
| 26 |                  |            |            |            |            |
| 27 |                  |            |            |            |            |
| 28 |                  |            |            |            |            |
| 29 |                  |            |            |            |            |
| 30 |                  |            |            |            |            |
| 31 |                  |            |            |            |            |
| 32 |                  |            |            |            |            |
| 33 |                  |            |            |            |            |
| 34 |                  |            |            |            |            |
| 35 |                  |            |            |            |            |
| 36 |                  |            |            |            |            |
| 37 |                  |            |            |            |            |
| 38 |                  |            |            |            |            |
| 39 |                  |            |            |            |            |
| 40 |                  |            |            |            |            |
| 41 |                  |            |            |            |            |
| 42 |                  |            |            |            |            |
| 43 |                  |            |            |            |            |
| 44 |                  |            |            |            |            |
| 45 |                  |            |            |            |            |
| 46 |                  |            |            |            |            |
| 47 |                  |            |            |            |            |
| 48 |                  |            |            |            |            |
| 49 |                  |            |            |            |            |
| 50 |                  |            |            |            |            |
| 51 |                  |            |            |            |            |
| 52 |                  |            |            |            |            |
| 53 |                  |            |            |            |            |
| 54 |                  |            |            |            |            |
| 55 |                  |            |            |            |            |
| 56 |                  |            |            |            |            |
| 57 |                  |            |            |            |            |
| 58 |                  |            |            |            |            |
| 59 |                  |            |            |            |            |
| 60 |                  |            |            |            |            |

1  
2  
3 **Author Contributions:** Conceptualization, Amy Kennalley and Brian Piper; Data  
4 curation, Amy Kennalley and Jessica Fanelli; Formal analysis, Amy Kennalley;  
5 Investigation, Amy Kennalley; Methodology, Brian Piper; Project administration,  
6 Kenneth McCall; Supervision, Brian Piper; Visualization, Amy Kennalley; Writing –  
7 original draft, Amy Kennalley; Writing – review & editing, Jessica Fanelli, John Furst Jr.,  
8 Nicholas Mynarski, Margaret Jarvis, Stephanie Nichols, Kenneth McCall and Brian  
9 Piper.  
10  
11

12 **Institutional Review Board Statement:** The Binghamton University IRB issued  
13 (STUDY00003951) this research project an Exempt approval waived under Section 45  
14 CFR 46 104(d)(4) of the Code of Federal Regulations.  
15  
16

17 **Informed Consent Statement:** Not applicable.  
18

19 **Acknowledgments:** Thank you to Iris Johnston for providing access to journal articles,  
20 and Olapeju Simoyan, MD for providing feedback.  
21  
22  
23  
24  
25  
26  
27  
28  
29  
30  
31  
32  
33  
34  
35  
36  
37  
38  
39  
40  
41  
42  
43  
44  
45  
46  
47  
48  
49  
50  
51  
52  
53  
54  
55  
56  
57  
58  
59  
60



## References

1. Peterkin, A.; Laks, J.; Weinstein, Z.M. Current best practices for acute and chronic management of patients with Opioid Use Disorder. *Med Clin North Am.* 2022, 106(1), 61–80; DOI:10.1016/j.mcna.2021.08.009.
2. Anderson, I.B.; Kearney, T.E. Use of methadone. *West J Med* 2000, 172(1), 43–46; DOI: 10.1136/ewjm.172.1.43.
3. Toce, M.S.; Chai, P.R.; Burns, M.M.; Boyer, E.W. Pharmacologic treatment of Opioid Use Disorder: A review of pharmacotherapy, adjuncts, and toxicity. *J Med Toxicol* 2018, 14(4), 306–322; DOI: 10.1007/s13181-018-0685-1.
4. Kennalley, A.L.; Furst, J.A.; Mynarski, N.J.; McCall, K.L.; Piper, B.J. Methadone distribution increased from 2010 to 2019 for Opioid Use Disorder treatment in the US. *MedRxiv* 2021, DOI:10.1101/2022.03.09.22272154.
5. Substance Abuse Mental Health Services Administration. Available online: <https://www.samhsa.gov/sites/default/files/otp-guidance-20200316.pdf> (Accessed on 15 February 2022).
6. Krawczyk, N.; Jent, V.; Hadland, S.E.; Cerdá, M. Utilization of medications for Opioid Use Disorder across US states: Relationship to treatment availability and overdose mortality. *J. Addict. Med.* 2022, 16(1), 114–117; DOI:10.1097/ADM.0000000000000820.
7. Mattick, R.P.; Breen, C.; Kimber, J.; Davoli, M. Methadone maintenance therapy versus no opioid replacement therapy for opioid dependence. *Cochrane Database Syst. Rev.* 2009, 2009(3), CD002209; DOI:10.1002/14651858.CD002209.pub2.
8. Jones, C.M.; Compton, W.M.; Han, B.; Baldwin, G.; Volkow, N.D. Methadone-involved overdose deaths in the US before and after federal policy changes expanding take-home methadone doses from opioid treatment programs. *JAMA Psychiatry* 2022, 79(9), 932–934; DOI:10.1001/jamapsychiatry.2022.1776.
9. Kaufman, D.E.; Kennalley, A.L.; McCall, K.L.; Piper, B.J. Examination of methadone involved overdoses during the COVID-19 pandemic. *Forensic Sci. Int.* 2023, in print.
10. Darracq, M.A.; Thornton, S.L. Respiratory depression following medications for opioid use disorder (MOUD)-approved buprenorphine product oral exposures; National Poison Database System 2003-2019. *Clin Toxicol (Phila).* 2021, 59(4), 303-312; DOI:10.1080/15563650.2020.1814318.
11. Bahji, A.; Cheng, B.; Gray, S.; Stuart, H. Reduction in mortality risk with opioid agonist therapy: a systematic review and meta-analysis. *Acta Psychiatr Scand.* 2019, 140(4), 313-339; DOI:10.1111/acps.13088.
12. Heil, J.; Ganetsky, V.S.; Salzman, M.S.; Hunter, K.; Baston, K.E.; Carroll, G.; Ketcham, E.; Haroz, R. Attitudes on methadone utilization in the emergency department: A physician cross-sectional study. *West J Emerg Med* 2022, 23(3), 386–395; DOI:10.5811/westjem.2022.2.54681.

13. Lagisetty, P.A.; Ross, R.; Bohnert, A.; Clay, M.; Maust, D.T. Buprenorphine treatment divide by race/ethnicity and payment. *JAMA Psychiatry* 2019, 76(9), 979–981; DOI:10.1001/jamapsychiatry.2019.0876.
14. Hickman, M.; Steer, C.; Tilling, K.; Lim, A.G.; Marsden, J.; Millar, T.; Strang, J.; Telfer, M.; Vickerman, P.; Macleod, J. The impact of buprenorphine and methadone on mortality: a primary care cohort study in the United Kingdom. *Addiction (Abingdon, England)* 2018, 113(8), 1461–1476; DOI:10.1111/add.14188.
15. Calcaterra, S.L.; Bach, P.; Chadi, A.; Chadi, N.; Kimmel, S.D.; Morford, K.L.; Roy, P.; Samet, J.H. Methadone matters: What the United States can learn from the global effort to treat opioid addiction. *Gen Intern Med.* 2019, 34(6), 1039–1042; DOI:10.1007/s11606-018-4801-3.
16. Jones, C.M.; Byrd, D.J.; Clarke, T.J.; Campbell, T.B.; Ohuoha, C.; McCance-Katz E.F. Characteristics and current clinical practices of opioid treatment programs in the United States. *Drug Alcohol Depend.* 2019, 205, 107616; DOI:10.1016/j.drugalcdep.2019.107616.
17. Marsch L.A. The efficacy of methadone maintenance interventions in reducing illicit opiate use, HIV risk behavior and criminality: a meta-analysis. *Addiction* 1998, 93(4), 515–532; DOI:10.1046/j.1360-0443.1998.9345157.x.
18. Otiashvili, D.; Piralishvili, G.; Sikharulidze, Z.; Kamkamidze, G.; Poole, S.; Woody, G.E. Methadone and buprenorphine-naloxone are effective in reducing illicit buprenorphine and other opioid use, and reducing HIV risk behavior--outcomes of a randomized trial. *Drug Alcohol Depend.* 2013, 133(2), 376–382; DOI:10.1016/j.drugalcdep.2013.06.024.
19. Mattick, R.P.; Breen, C.; Kimber, J.; Davoli, M. Buprenorphine maintenance versus placebo or methadone maintenance for opioid dependence. *Cochrane Database Syst Rev.* 2014, (2), CD002207, DOI:10.1002/14651858.CD002207.pub4.
20. National Institute on Drug Abuse. Available online: <https://nida.nih.gov/publications/research-reports/medications-to-treat-opioid-addiction/overview> (accessed on 23 December 2022).
21. Presnall, N.J.; Butler, G.C.; Gruzca, R.A. Consumer access to buprenorphine and methadone in certified community behavioral health centers: A secret shopper study. *J Subst Abuse Treat* 2022, 139, 108788; DOI:10.1016/j.jsat.2022.108788.
22. Centers for Disease Control and Prevention. Available online: <https://www.cdc.gov/nchs/nvss/vsrr/drug-overdose-data.htm> (accessed on 22 February 2022).
23. Friedman, J.R.; Hansen, H. Evaluation of increases in drug overdose mortality rates in the US by race and ethnicity before and during the COVID-19 pandemic. *JAMA Psychiatry* 2022, 79(4), 379–381; DOI:10.1001/jamapsychiatry.2022.0004.

- 1
  - 2
  - 3
  - 4
  - 5
  - 6
  - 7
  - 8
  - 9
  - 10
  - 11
  - 12
  - 13
  - 14
  - 15
  - 16
  - 17
  - 18
  - 19
  - 20
  - 21
  - 22
  - 23
  - 24
  - 25
  - 26
  - 27
  - 28
  - 29
  - 30
  - 31
  - 32
  - 33
  - 34
  - 35
  - 36
  - 37
  - 38
  - 39
  - 40
  - 41
  - 42
  - 43
  - 44
  - 45
  - 46
  - 47
  - 48
  - 49
  - 50
  - 51
  - 52
  - 53
  - 54
  - 55
  - 56
  - 57
  - 58
  - 59
  - 60
24. Centers for Disease Control and Prevention. Available online: [https://www.cdc.gov/nchs/pressroom/nchs\\_press\\_releases/2021/20211117.htm](https://www.cdc.gov/nchs/pressroom/nchs_press_releases/2021/20211117.htm) (accessed on 31 March 2022).
25. Friedman, J.; Akre, S. COVID-19 and the drug overdose crisis: Uncovering the deadliest months in the United States, January–July 2020. *Am J Public Health* 2021, 111(7), 1284-1291; DOI:10.2105/AJPH.2021.306256.
26. Joudrey, P.J.; Adams, Z.M.; Bach, P.; Van Buren, S.; Chaiton, J.A.; Ehrenfeld, L.; Guerra, M.E.; Gleeson, B.; Kimmel, S.D.; Medley, A.; Mekideche, W.; Paquet, M.; Sung, M.; Wang, M.; You Kheang, R.O.O.; Zhang, J.; Wang, E.A.; Edelman, E.J. Methadone access for Opioid Use Disorder During the COVID-19 pandemic within the United States and Canada. *JAMA Network Open* 2021, 4(7), e2118223; DOI: 10.1001/jamanetworkopen.2021.18223.
27. Bandara, S.; Kennedy-Hendricks, A.; Merritt, S.; Barry, C.L.; Saloner, B. Early effects of COVID-19 on programs providing medications for Opioid Use Disorder in jails and prisons. *J Addict Med* 2020, 14(5), e257-e260; DOI:10.1097/ADM.0000000000000718.
28. Bandara, S.; Kennedy-Hendricks, A.; Merritt, S.; Barry, C.L.; Saloner, B. Methadone and buprenorphine treatment in United States jails and prisons: lessons from early adopters. *Addiction* 2021, 116(12), 3473-3481; DOI:10.1111/add.15565.
29. Maine Department of Corrections. Available online: [https://www.maine.gov/corrections/sites/maine.gov.corrections/files/inline-files/MAT\\_Year\\_One\\_ReviewFinal.pdf](https://www.maine.gov/corrections/sites/maine.gov.corrections/files/inline-files/MAT_Year_One_ReviewFinal.pdf) (accessed on 19 October 2022).
30. Furst, J.A.; Mynarski, N.J.; McCall, K.L.; Piper, B.J. Pronounced regional disparities in United States methadone distribution. *Ann Pharmacother.* 2022, 56(3), 271-279; DOI:10.1177/10600280211028262.
31. Kennalley, A.L.; Bouregghda, Y.A.; Ganesh, J.G.; Watkins, A.M.; McCall, K.L.; Piper, B.J. Declining national codeine distribution in United States hospitals and pharmacies from 2011 to 2019. *MedRxiv* 2022, DOI:10.1101/2022.04.12.22273805.
32. Piper, B.J.; Shah, D.T.; Simoyan, O.M.; Mccall, K.L.; Nichols, S.D. Trends in medical use of opioids in the U.S., 2006–2016. *Am. J. Prev. Med.* 2021, 54(5), 652–660; DOI:10.1016/j.amepre.2018.01.034.
33. Chen, A. Y.; Powell, D.; Stein, B. D. Changes in buprenorphine and methadone supplies in the US during the COVID-19 pandemic. *JAMA Network Open* 2022, 5(7), e2223708; DOI:10.1001/jamanetworkopen.2022.23708.
34. Peterman, N. J.; Palsgaard, P.; Vashi, A.; Vashi, T.; Kaptur, B. D.; Yeo, E.; Mccauley, W. Demographic and geospatial analysis of buprenorphine and methadone prescription rates. *Cureus* 2022, 14; DOI:10.7759/cureus.25477.
35. Substance Abuse and Mental Health Services Administration. Available online: <https://www.samhsa.gov/data/report/national-survey-substance-abuse-treatment-services-n-ssats-2020-data-substance-abuse> (accessed on 11 February 2023).

- 1
  - 2
  - 3
  - 4
  - 5
  - 6
  - 7
  - 8
  - 9
  - 10
  - 11
  - 12
  - 13
  - 14
  - 15
  - 16
  - 17
  - 18
  - 19
  - 20
  - 21
  - 22
  - 23
  - 24
  - 25
  - 26
  - 27
  - 28
  - 29
  - 30
  - 31
  - 32
  - 33
  - 34
  - 35
  - 36
  - 37
  - 38
  - 39
  - 40
  - 41
  - 42
  - 43
  - 44
  - 45
  - 46
  - 47
  - 48
  - 49
  - 50
  - 51
  - 52
  - 53
  - 54
  - 55
  - 56
  - 57
  - 58
  - 59
  - 60
36. Medicaid.gov. Available online: <https://www.medicaid.gov/medicaid/prescription-drugs/state-drug-utilization-data/index.html> (accessed on 26 July 2022).
37. Chorniy, A.; Currie, J.; Sonchak, L. Exploding asthma and ADHD caseloads: The role of Medicaid managed care. *J. Health Econ.* 2018, 60, 1–15. DOI:10.1016/j.jhealeco.2018.04.002.
38. Medicaid.gov. (2020). Mandatory Medicaid State Plan Coverage of Medication-Assisted Treatment Available online: <https://www.medicaid.gov/federal-policy-guidance/downloads/sho20005.pdf> (accessed on 26 July 2022).
39. Saloner, B.; Stoller, K.B.; Barry, C.L. Medicaid coverage for methadone maintenance and use of opioid agonist therapy in specialty addiction treatment. *Psychiatr Serv.* 2016, 67(6), 676–679; DOI:10.1176/appi.ps.201500228.
40. United States Census Bureau. Available online: <https://www.census.gov/topics/population.html> (accessed on 23 January 2022).
41. Cabrera, F.F.; Gamarra, E.R.; Garcia, T.E.; Littlejohn, A.D.; Chinga, P.A.; Pinentel-Morillo, L.D.; Tirado, J.R.; Chung, D.Y.; Pande, L.J.; McCall, K.L.; Nichols, S.D.; Piper, B.J. Opioid distribution trends (2006–2017) in the US Territories. *PeerJ* 2019, 2019(1), 1–12; DOI:10.7717/peerj.6272.
42. Smith C.B. Socio-spatial stigmatization and the contested space of addiction treatment: remapping strategies of opposition to the disorder of drugs. *Social Science & Medicine* (1982) 2010, 70(6), 859–866; DOI:10.1016/j.socscimed.2009.10.033.
43. Welsh, C.; Doyon, S.; Hart, K. Methadone exposures reported to poison control centers in the United States following the COVID-19-related loosening of federal methadone regulations. *Int J Drug Policy* 2022, 102, 103591; DOI:10.1016/j.drugpo.2022.103591.
44. Centers for Disease Control and Prevention. Available online: <https://www.cdc.gov/nchs/products/databriefs/db428.htm> (accessed on 23 January 2022).
45. Bart, G.; Wastvedt, S.; Hodges, J.S.; Rosenthal, R. Did drug use increase following COVID-19 relaxation of methadone take-out regulations? 2020 was a complicated year. *J Subst Abuse Treat.* 2022, 133, 108590; DOI:10.1016/j.jsat.2021.108590.
46. Breve, F.; Batastini, L.; LeQuang, J.A.K.; Marcharndo, G. Mobile narcotic treatment programs: On the road again? *Cureus* 2022, 14(3), e23221; DOI:10.7759/cureus.23221.
47. Kaiser Family Foundation. Available online: <https://www.kff.org/infographic/medicaids-role-in-addressing-opioid-epidemic/> (accessed on 22 September 2022).
48. Grissinger, M. Keeping patients safe from methadone overdoses. *P T* 2011, 36(8), 462–466.
49. Kaiser Family Foundation. Available online: <https://www.kff.org/health-reform/state-indicator/state-activity-around-expanding-medicaid-under-the-affordable-care->

- act/?currentTimeframe=0&sortModel=%7B%22collId%22:%22Location%22,%22sort%22:%22asc%22%7D (accessed 22 September 2022).
50. The Pew Charitable Trusts. Available online: <https://www.pewtrusts.org/en/research-and-analysis/articles/2021/04/22/more-flexible-methadone-access-should-continue-post-pandemic> (accessed 31 March 2022).
51. Hyde, T.F.; Bekoe-Tabiri, A.D.; Kropp Lopez, A.K.; Devia, L.G.; Gutierrez, B.D.; Lara, M.C.; Soto, A.R.; Kaufman, D.E.; Moran, M.T.; Simpson, K.J.; Shah, D.T.; Foster, M.; Desrosiers, C.E.; Hebert, J.; Nichols, S.D.; McCall, K.L.; Piper, B.J. County and demographic differences in drug arrests and controlled substance use in Maine. *J. Maine Med. Ctr.* 2021, 3; DOI:10.46804/2641-2225.1074.
52. Jehan, S.; Zahnd, W.E.; Wooten, N.R.; Seay, K.D. Geographic variation in availability of opioid treatment programs across U.S. communities. *J Addict Dis* 2023, DOI: 10.1080/10550887.2023.2165869.
53. Substance Abuse Mental Health Services Administration. Available online: <https://www.samhsa.gov/medication-assisted-treatment/statutes-regulations-guidelines/methadone-guidance> (accessed 15 February 2022).
54. Amram, O.; Amiri, S.; Panwala, V.; Lutz, R.; Joudrey, P.J.; Socias, E. The impact of relaxation of methadone take-home protocols on treatment outcomes in the COVID-19 era. *Am J Drug Alcohol Abuse* 2021, 47(6), 722-729; DOI:10.1080/00952990.2021.1979991.
55. Regulatory Studies Center. Available online: <https://regulatorystudies.columbian.gwu.edu/extending-pandemic-flexibilities-opioid-use-disorder-treatment> (accessed on 2 March 2022).
56. Kleinman, R.A.; Sanches, M. Methadone-involved overdose deaths in the United States before and during the COVID-19 pandemic. *Drug Alcohol Depend* 2023, 242, 109703; DOI:10.1016/j.drugalcdep.2022.109703.
57. Darnton, J.B.; Bhatraju, E.P.; Beima-Sofie, K.; Michaels, A.; Hallgren, K.A.; Soth, S.; Grekin, P.; Woolworth, S.; Tsui, J.I. "Sign Me Up": a qualitative study of video observed therapy (VOT) for patients receiving expedited methadone take-homes during the COVID-19 pandemic. *Addict Sci Clin Pract* 2023, 18, 21; DOI:10.1186/s13722-023-00372-3.
58. Gibbons, J.B.; Stuart, E.A.; Saloner, B. Methadone on wheels-A new option to expand access to care through mobile units. *JAMA Psychiatry* 2022, 79(3), 187-188; DOI:10.1001/jamapsychiatry.2021.3716.
59. Peckham, A.M.; Ball, J.; Colvard, M.D.; Dadiomov, D.; Hill, L.G.; Nichols, S.D.; Tallian, K.; Ventricelli, D.J.; Tran, T.H. Lev-eraging pharmacists to maintain and extend buprenorphine supply for opioid use disorder amid COVID-19 pandemic. *Am J Health Syst Pharm* 2021, 78(7), 613-618; DOI:10.1093/ajhp/zxab003.
60. Substance Abuse and Mental Health Services Administration. Available online: <https://www.samhsa.gov/medications-substance-use-disorders/removal-data-waiver-requirement> (accessed on 1 February 2023).

- 1  
2  
3  
4  
5  
6  
7  
8  
9  
10  
11  
12  
13  
14  
15  
16  
17  
18  
19  
20  
21  
22  
23  
24  
25  
26  
27  
28  
29  
30  
31  
32  
33  
34  
35  
36  
37  
38  
39  
40  
41  
42  
43  
44  
45  
46  
47  
48  
49  
50  
51  
52  
53  
54  
55  
56  
57  
58  
59  
60
61. Green, T.C.; Serafinski, R.; Clark, S.A.; Rich, J.D.; Bratberg, J. Physician-delegated unobserved induction with buprenorphine in pharmacies. *N Engl J Med.* 2023, 388(2), 185-186; DOI:10.1056/NEJMc2208055.
62. Congress.gov. Available online: <https://www.congress.gov/bill/117th-congress/house-bill/2617> (accessed on 11 February 2023).
63. American Psychiatric Association. Available online: <https://www.psychiatry.org/psychiatrists/practice/telepsychiatry/toolkit/ryan-haight-act> (accessed on 10 March 2023).
64. The Washington Post. Available online: <https://www.washingtonpost.com/health/2023/03/05/methadone-addiction-treatment-prescription/> (accessed on 10 March 2023).
65. Presnall, N.J.; Butler, G.C.; Gruzca, R.A. Consumer access to buprenorphine and methadone in certified community behavioral health centers: A secret shopper study. *J Subst Abuse Treat* 2022, 139, 108788; DOI:10.1016/j.jsat.2022.108788.

## Unable to Convert Image

The dimensions of this image (in pixels) are too large to be converted. For this image to convert, the total number of pixels (height x width) must be less than 40,000,000 (40 megapixels).

Figure 1. Percent change from 2010 to 2020 in methadone distribution as reported by the Drug Enforcement Administration's Automated Reports and Consolidated Ordering System for Opioid Use Disorder. Percent change between 1.5 SDs and 1.959 SDs from the mean (+96.96%, SD = 146.64%), indicated with a #. Percent change >  $\pm 1.96$  SD from the mean was considered significant (\*P < 0.05).

## Unable to Convert Image

The dimensions of this image (in pixels) are too large to be converted. For this image to convert, the total number of pixels (height x width) must be less than 40,000,000 (40 megapixels).

Figure 2. Percent change from 2015 to 2020 in methadone distribution as reported by the Drug Enforcement Administration's Automated Reports and Consolidated Ordering System for Opioid Use Disorder. Percent change between 1.5 SDs and 1.959 SDs from the mean (+26.22%, SD = 50.38%), indicated with a #. Percent change >  $\pm 1.96$  SD from the mean was considered significant (\*P < 0.05).



## Unable to Convert Image

The dimensions of this image (in pixels) are too large to be converted. For this image to convert, the total number of pixels (height x width) must be less than 40,000,000 (40 megapixels).

Figure 3. Percent change from 2019 to 2020 in methadone distribution as reported by the Drug Enforcement Administration's Automated Reports and Consolidated Ordering System for Opioid Use Disorder. Percent change between 1.5 SDs and 1.959 SDs from the mean (-0.09%, SD 10.81), indicated with a #. Percent change  $> \pm 1.96$  SD from the mean was considered significant (\*P < 0.05).

## Unable to Convert Image

The dimensions of this image (in pixels) are too large to be converted. For this image to convert, the total number of pixels (height x width) must be less than 40,000,000 (40 megapixels).

Figure 4. Percent change from 2019 to 2021 in methadone distribution as reported by the Drug Enforcement Administration's Automated Reports and Consolidated Ordering System for Opioid Use Disorder. Percent change between 1.5 SDs and 1.959 SDs from the mean (-5.15%, SD 19.14), indicated with a #. Percent change  $> \pm 1.96$  SD from the mean was considered significant (\* $P < 0.05$ ).

## Unable to Convert Image

The dimensions of this image (in pixels) are too large to be converted. For this image to convert, the total number of pixels (height x width) must be less than 40,000,000 (40 megapixels).

Figure 5. Number of opioid treatment programs per 1 million persons per state all significantly ( $P < 0.0001$ ) different from 2010, 2015, 2020 and 2021. The twenty states that decreased in 2021 relative to 2010, 2015 or 2020 are indicated with a "d". DC: District of Columbia.

## Unable to Convert Image

The dimensions of this image (in pixels) are too large to be converted. For this image to convert, the total number of pixels (height x width) must be less than 40,000,000 (40 megapixels).

1  
2  
3  
4  
5  
6  
7  
8  
9  
10  
11  
12  
13  
14  
15  
16  
17  
18  
19  
20  
21  
22  
23  
24  
25  
26  
27  
28  
29  
30  
31  
32  
33  
34  
35  
36  
37  
38  
39  
40  
41  
42  
43  
44  
45  
46  
47  
48  
49  
50  
51  
52  
53  
54  
55  
56  
57  
58  
59  
60

A. Distribution (kg)

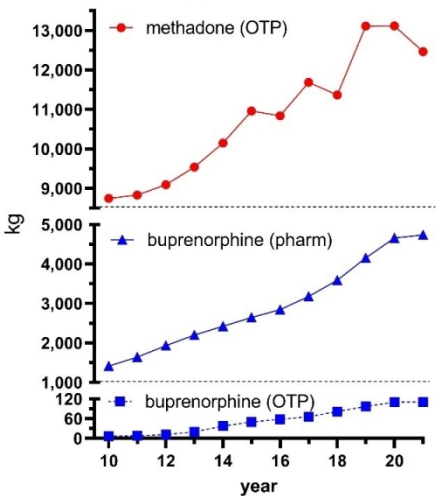

B. Distributors

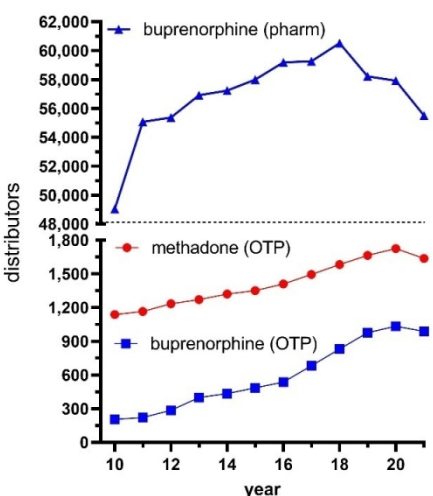

165x98mm (220 x 220 DPI)

## Unable to Convert Image

The dimensions of this image (in pixels) are too large to be converted. For this image to convert, the total number of pixels (height x width) must be less than 40,000,000 (40 megapixels).

**STROBE 2007 (v4) checklist of items to be included in reports of observational studies in epidemiology\***  
**Checklist for cohort, case-control, and cross-sectional studies (combined)**

| Section/Topic             | Item # | Recommendation                                                                                                                                                                                                                                                                                                                                                                                                                                                         | Reported on page # |
|---------------------------|--------|------------------------------------------------------------------------------------------------------------------------------------------------------------------------------------------------------------------------------------------------------------------------------------------------------------------------------------------------------------------------------------------------------------------------------------------------------------------------|--------------------|
| Title and abstract        | 1      | (a) Indicate the study's design with a commonly used term in the title or the abstract                                                                                                                                                                                                                                                                                                                                                                                 | 1                  |
|                           |        | (b) Provide in the abstract an informative and balanced summary of what was done and what was found                                                                                                                                                                                                                                                                                                                                                                    | 2                  |
| <b>Introduction</b>       |        |                                                                                                                                                                                                                                                                                                                                                                                                                                                                        |                    |
| Background/rationale      | 2      | Explain the scientific background and rationale for the investigation being reported                                                                                                                                                                                                                                                                                                                                                                                   | 4                  |
| Objectives                | 3      | State specific objectives, including any pre-specified hypotheses                                                                                                                                                                                                                                                                                                                                                                                                      | 5                  |
| <b>Methods</b>            |        |                                                                                                                                                                                                                                                                                                                                                                                                                                                                        |                    |
| Study design              | 4      | Present key elements of study design early in the paper                                                                                                                                                                                                                                                                                                                                                                                                                | 6                  |
| Setting                   | 5      | Describe the setting, locations, and relevant dates, including periods of recruitment, exposure, follow-up, and data collection                                                                                                                                                                                                                                                                                                                                        | 6                  |
| Participants              | 6      | (a) <i>Cohort study</i> —Give the eligibility criteria, and the sources and methods of selection of participants. Describe methods of follow-up<br><i>Case-control study</i> —Give the eligibility criteria, and the sources and methods of case ascertainment and control selection. Give the rationale for the choice of cases and controls<br><i>Cross-sectional study</i> —Give the eligibility criteria, and the sources and methods of selection of participants | 6                  |
|                           |        | (b) <i>Cohort study</i> —For matched studies, give matching criteria and number of exposed and unexposed<br><i>Case-control study</i> —For matched studies, give matching criteria and the number of controls per case                                                                                                                                                                                                                                                 | 6                  |
| Variables                 | 7      | Clearly define all outcomes, exposures, predictors, potential confounders, and effect modifiers. Give diagnostic criteria, if applicable                                                                                                                                                                                                                                                                                                                               | 6                  |
| Data sources/ measurement | 8*     | For each variable of interest, give sources of data and details of methods of assessment (measurement). Describe comparability of assessment methods if there is more than one group                                                                                                                                                                                                                                                                                   | 6                  |
| Bias                      | 9      | Describe any efforts to address potential sources of bias                                                                                                                                                                                                                                                                                                                                                                                                              | 6                  |
| Study size                | 10     | Explain how the study size was arrived at                                                                                                                                                                                                                                                                                                                                                                                                                              | 6                  |
| Quantitative variables    | 11     | Explain how quantitative variables were handled in the analyses. If applicable, describe which groupings were chosen and why                                                                                                                                                                                                                                                                                                                                           | 6                  |
| Statistical methods       | 12     | (a) Describe all statistical methods, including those used to control for confounding                                                                                                                                                                                                                                                                                                                                                                                  | 6                  |
|                           |        | (b) Describe any methods used to examine subgroups and interactions                                                                                                                                                                                                                                                                                                                                                                                                    | 6                  |
|                           |        | (c) Explain how missing data were addressed                                                                                                                                                                                                                                                                                                                                                                                                                            | 6                  |
|                           |        | (d) <i>Cohort study</i> —If applicable, explain how loss to follow-up was addressed<br><i>Case-control study</i> —If applicable, explain how matching of cases and controls was addressed                                                                                                                                                                                                                                                                              | 6                  |

|                          |     |                                                                                                                                                                                                              |           |
|--------------------------|-----|--------------------------------------------------------------------------------------------------------------------------------------------------------------------------------------------------------------|-----------|
|                          |     | <i>Cross-sectional study</i> —If applicable, describe analytical methods taking account of sampling strategy                                                                                                 |           |
|                          |     | (e) Describe any sensitivity analyses                                                                                                                                                                        | 6         |
| <b>Results</b>           |     |                                                                                                                                                                                                              |           |
| Participants             | 13* | (a) Report numbers of individuals at each stage of study—eg numbers potentially eligible, examined for eligibility, confirmed eligible, included in the study, completing follow-up, and analysed            | 6         |
|                          |     | (b) Give reasons for non-participation at each stage                                                                                                                                                         | 6         |
|                          |     | (c) Consider use of a flow diagram                                                                                                                                                                           | 6         |
| Descriptive data         | 14* | (a) Give characteristics of study participants (eg demographic, clinical, social) and information on exposures and potential confounders                                                                     | 6         |
|                          |     | (b) Indicate number of participants with missing data for each variable of interest                                                                                                                          | 6         |
|                          |     | (c) <i>Cohort study</i> —Summarise follow-up time (eg, average and total amount)                                                                                                                             | 6         |
| Outcome data             | 15* | <i>Cohort study</i> —Report numbers of outcome events or summary measures over time                                                                                                                          | 7         |
|                          |     | <i>Case-control study</i> —Report numbers in each exposure category, or summary measures of exposure                                                                                                         | 7         |
|                          |     | <i>Cross-sectional study</i> —Report numbers of outcome events or summary measures                                                                                                                           | 7         |
| Main results             | 16  | (a) Give unadjusted estimates and, if applicable, confounder-adjusted estimates and their precision (eg, 95% confidence interval). Make clear which confounders were adjusted for and why they were included | 7         |
|                          |     | (b) Report category boundaries when continuous variables were categorized                                                                                                                                    | 7         |
|                          |     | (c) If relevant, consider translating estimates of relative risk into absolute risk for a meaningful time period                                                                                             | 7         |
| Other analyses           | 17  | Report other analyses done—eg analyses of subgroups and interactions, and sensitivity analyses                                                                                                               | 7, 8      |
| <b>Discussion</b>        |     |                                                                                                                                                                                                              |           |
| Key results              | 18  | Summarise key results with reference to study objectives                                                                                                                                                     | 8         |
| Limitations              | 19  | Discuss limitations of the study, taking into account sources of potential bias or imprecision. Discuss both direction and magnitude of any potential bias                                                   | 10        |
| Interpretation           | 20  | Give a cautious overall interpretation of results considering objectives, limitations, multiplicity of analyses, results from similar studies, and other relevant evidence                                   | 9         |
| Generalisability         | 21  | Discuss the generalisability (external validity) of the study results                                                                                                                                        | 9, 10, 11 |
| <b>Other information</b> |     |                                                                                                                                                                                                              |           |
| Funding                  | 22  | Give the source of funding and the role of the funders for the present study and, if applicable, for the original study on which the present article is based                                                | 3         |

\*Give information separately for cases and controls in case-control studies and, if applicable, for exposed and unexposed groups in cohort and cross-sectional studies.

**Note:** An Explanation and Elaboration article discusses each checklist item and gives methodological background and published examples of transparent reporting. The STROBE checklist is best used in conjunction with this article (freely available on the Web sites of PLoS Medicine at <http://www.plosmedicine.org/>, Annals of Internal Medicine at <http://www.annals.org/>, and Epidemiology at <http://www.epidem.com/>). Information on the STROBE Initiative is available at [www.strobe-statement.org](http://www.strobe-statement.org).



# BMJ Open

## Dynamic Changes in Methadone Utilization for Opioid Use Disorder Treatment: A Retrospective Observational Study During the COVID-19 Pandemic

|                                 |                                                                                                                                                                                                                                                                                                                                                                                                                                                                                                                                                                                                                                                                                                            |
|---------------------------------|------------------------------------------------------------------------------------------------------------------------------------------------------------------------------------------------------------------------------------------------------------------------------------------------------------------------------------------------------------------------------------------------------------------------------------------------------------------------------------------------------------------------------------------------------------------------------------------------------------------------------------------------------------------------------------------------------------|
| Journal:                        | <i>BMJ Open</i>                                                                                                                                                                                                                                                                                                                                                                                                                                                                                                                                                                                                                                                                                            |
| Manuscript ID                   | bmjopen-2023-074845.R1                                                                                                                                                                                                                                                                                                                                                                                                                                                                                                                                                                                                                                                                                     |
| Article Type:                   | Original research                                                                                                                                                                                                                                                                                                                                                                                                                                                                                                                                                                                                                                                                                          |
| Date Submitted by the Author:   | 05-Oct-2023                                                                                                                                                                                                                                                                                                                                                                                                                                                                                                                                                                                                                                                                                                |
| Complete List of Authors:       | Kennalley, Amy; Geisinger Commonwealth School of Medicine, Department of Medical Education<br>Fanelli, Jessica ; Geisinger Commonwealth School of Medicine, Department of Medical Education<br>Furst, John; Geisinger Commonwealth School of Medicine, Department of Medical Education<br>Mynarski, Nicholas; Geisinger Commonwealth School of Medicine, Department of Medical Education<br>Jarvis, Margaret; Geisinger Clinic<br>Nichols, Stephanie ; University of New England, Department of Pharmacy Practice<br>McCall, Kenneth L.; Binghamton University, Department of Pharmacy Practice<br>Piper, Brian J.; Geisinger Commonwealth School of Medicine; Center for Pharmacy Innovation and Outcomes |
| <b>Primary Subject Heading</b>: | Addiction                                                                                                                                                                                                                                                                                                                                                                                                                                                                                                                                                                                                                                                                                                  |
| Secondary Subject Heading:      | Medical management, Pharmacology and therapeutics, Rehabilitation medicine                                                                                                                                                                                                                                                                                                                                                                                                                                                                                                                                                                                                                                 |
| Keywords:                       | COVID-19, EPIDEMIOLOGY, Health Services Accessibility, Substance misuse < PSYCHIATRY, REHABILITATION MEDICINE                                                                                                                                                                                                                                                                                                                                                                                                                                                                                                                                                                                              |
|                                 |                                                                                                                                                                                                                                                                                                                                                                                                                                                                                                                                                                                                                                                                                                            |

SCHOLARONE™  
Manuscripts



I, the Submitting Author has the right to grant and does grant on behalf of all authors of the Work (as defined in the below author licence), an exclusive licence and/or a non-exclusive licence for contributions from authors who are: i) UK Crown employees; ii) where BMJ has agreed a CC-BY licence shall apply, and/or iii) in accordance with the terms applicable for US Federal Government officers or employees acting as part of their official duties; on a worldwide, perpetual, irrevocable, royalty-free basis to BMJ Publishing Group Ltd ("BMJ") its licensees and where the relevant Journal is co-owned by BMJ to the co-owners of the Journal, to publish the Work in this journal and any other BMJ products and to exploit all rights, as set out in our [licence](#).

The Submitting Author accepts and understands that any supply made under these terms is made by BMJ to the Submitting Author unless you are acting as an employee on behalf of your employer or a postgraduate student of an affiliated institution which is paying any applicable article publishing charge ("APC") for Open Access articles. Where the Submitting Author wishes to make the Work available on an Open Access basis (and intends to pay the relevant APC), the terms of reuse of such Open Access shall be governed by a Creative Commons licence – details of these licences and which [Creative Commons](#) licence will apply to this Work are set out in our licence referred to above.

Other than as permitted in any relevant BMJ Author's Self Archiving Policies, I confirm this Work has not been accepted for publication elsewhere, is not being considered for publication elsewhere and does not duplicate material already published. I confirm all authors consent to publication of this Work and authorise the granting of this licence.

# Dynamic Changes in Methadone Utilization for Opioid Use Disorder Treatment: A Retrospective Observational Study During the COVID-19 Pandemic

Amy L. Kennalley<sup>1,\*</sup>, Jessica L. Fanelli<sup>1</sup>, John A. Furst Jr.<sup>1</sup>, Nicholas J. Mynarski<sup>1</sup>, Margaret A. Jarvis<sup>2</sup>, Stephanie D. Nichols<sup>3</sup>, Kenneth L. McCall<sup>4</sup>, and Brian J. Piper<sup>1,5</sup>

<sup>1</sup>Department of Medical Education, Geisinger Commonwealth School of Medicine, Scranton, PA, 18510, <sup>2</sup>Geisinger Clinic, Danville, PA, 17821, <sup>3</sup>Department of Pharmacy Practice, University of New England, Portland, ME 04103, <sup>4</sup>Department of Pharmacy Practice, Binghamton University, Johnson City, NY 13790, <sup>5</sup>Center for Pharmacy Innovation and Outcomes, Danville, PA, 18704

\*Correspondence: Amy Kennalley

525 Pine St, Scranton, PA 18510

akennalley01@som.geisinger.edu

(925) 408-5226

Keywords: COVID-19, opioid treatment, drug use, medication assisted treatment, Medicaid

Abstract: 275 / 300 words

Manuscript: 4,306 words

## ORCID

ALK: 0000-0003-1845-7765

BJP: 0000-0002-2295-445X

SDN: 0000-0001-9035-5953

## Abstract

**Objectives:** Opioid use disorder (OUD) is a major public health concern in the United States (US), resulting in high rates of overdose and other negative outcomes. Methadone, an OUD treatment, has been shown to be effective in reducing the risk of overdose and improving overall health and quality of life. This study analyzed the distribution of methadone for the treatment of OUD across the US over the past decade and through COVID-19 pandemic.

**Design:** Retrospective observational study using secondary data analysis of Drug Enforcement Administration and Medicaid databases.

**Setting:** United States.

**Participants:** Patients who were dispensed methadone at US Opioid Treatment Programs (OTPs).

**Primary and secondary outcome measures:** The primary outcomes were the overall pattern in methadone distribution and the number of OTPs in the US per year. The secondary outcome was Medicaid prescriptions for methadone.

**Results:** Methadone distribution for OUD has expanded significantly over the past decade, with an average state increase of +96.96% from 2010 to 2020. There was a significant increase in overall distribution of methadone to OTP from 2010 to 2020 (+61.00%,  $P \leq 0.001$ ) and from 2015 to 2020 (+26.22%,  $P < 0.001$ ). However, the distribution to OTPs did not significantly change from 2019 to 2021 (-5.15%,  $P = 0.491$ ). There was considerable state level variation in methadone prescribing to Medicaid patients with four states having no prescriptions.

**Conclusions:** There have been dynamic changes in methadone distribution for OUD. Furthermore, pronounced variation in methadone distribution among states were observed, with some states having no OTPs or Medicaid coverage. New policies are urgently needed to increase access to methadone treatment, address the opioid epidemic in the US, and reduce overdose deaths.

1  
2  
3 **Article Summary:** Strengths and limitations of this study  
4

- 5 • ARCOS provides novel data on distribution and distributors of methadone for  
6 OTPs over the past decade, pre- and post-COVID-19
- 7 • ARCOS reports methadone distribution by weight, not by patient count or  
8 prescriptions, and doesn't differentiate pharmacological formulations
- 9 • Incorporating Medicaid data compensates for the absence of patient level  
10 methadone data in ARCOS  
11  
12  
13  
14  
15  
16  
17  
18  
19  
20  
21  
22  
23  
24  
25  
26  
27  
28  
29  
30  
31  
32  
33  
34  
35  
36  
37  
38  
39  
40  
41  
42  
43  
44  
45  
46  
47  
48  
49  
50  
51  
52  
53  
54  
55  
56  
57  
58  
59  
60

## Introduction

The United States (US) Food and Drug Administration (FDA) has approved methadone, buprenorphine, and naltrexone as treatments for Opioid Use Disorder (OUD) [1], but there have been several policy changes impacting OUD care during the COVID-19 pandemic. Methadone, considered a gold standard medication for OUD (MOUD), is a long-acting synthetic opioid administered via opioid treatment programs (OTP) [1-3]. Since 2021, it has been revealed that only 27.8% of individuals with OUD have actually received MOUD treatment [4].

Over recent years, methadone take-home doses have been extended to 28 days for stable patients and 14 days for less stable patients, drug screening requirements have been relaxed, and telemedicine has been expanded for established patients [5, 6]. However, unlike for buprenorphine, starting methadone treatment requires an in-person visit. Prior to the pandemic, OUD methadone treatment also required the co-administration of counseling, and these counseling requirements have also been relaxed due to the COVID-19 pandemic [6-8].

Despite its effectiveness, methadone carries the potential for serious adverse effects including respiratory depression and cardiotoxicity [3, 9, 10]. An alternative gold standard MOUD, buprenorphine, has also raised safety concerns, with rising respiratory depression fatalities associated with oral doses in both adult and pediatric patients, resulting in a total of 84 deaths from 2003–2019 [11]. However, it is important to note that in 2021 alone, there were 106,699 overdose deaths in the US emphasizing the urgency of providing first-line care [12].

In regions where available, methadone is frequently used for severe OUD cases due to its full mu receptor agonist properties and its doses can be titrated up as needed. Buprenorphine is a partial mu receptor agonist with less higher end dosing flexibility [13]. Methadone necessitates expert handling, especially in the early stages of treatment because of its full agonism properties combined with high lipophilicity, long serum half-life, and active metabolites [14].

Due to its pharmacokinetic and pharmacodynamic properties [11], buprenorphine combined with naloxone may be becoming a more commonly prescribed option compared to methadone. A recent survey revealed 75% of emergency room physicians preferred buprenorphine over methadone [15]. Buprenorphine was inequitably available from 2004 to 2015 driven by systemic racism and discrimination based on socioeconomic status. In particular, Black patients had a lower probability of receiving a prescription [16]. Findings from a retrospective, cohort study from 1998 to 2014 suggest that patients treated with buprenorphine had a lower risk of drug-related poisoning mortality during treatment compared to those on methadone [17].

Compared to buprenorphine, treatment with methadone was more effective in reducing criminal activity, HIV infection, hepatitis, and overall mortality [2,18-21]. Additionally, a Cochrane meta-analysis concluded that methadone was better for

1  
2  
3 retaining patients in OUD treatment only if buprenorphine doses were 7mg per day or  
4 lower, but both methadone and buprenorphine were equivalent at higher doses  
5 (Supplemental Table 1) [22]. However, there is a nationwide accessibility problem for  
6 treatment with all potential MOUD [23, 24]. Although studies have shown that both  
7 treatments are effective, clinicians and patients should choose between MOUD  
8 treatments depending on their individual needs and circumstances, including the  
9 accessibility and availability of treatment programs in their area [2, 17-24].  
10  
11

12 Methadone is a safe and effective treatment for OUD in fentanyl users and is the  
13 preferred medication over buprenorphine in this population. Methadone treatment is  
14 associated with a significant decrease in illicit drug use, including fentanyl. However, it  
15 is important to start with a higher dose of methadone than in people who are not using  
16 fentanyl [25, 26]. Patients with OUD who are using fentanyl are at increased risk of  
17 overdose and relapse, but methadone treatment can significantly reduce this risk.  
18 Additionally, patients who test positive for fentanyl use at the start of methadone  
19 treatment are just as likely to achieve remission as patients who test negative for  
20 fentanyl use. Methadone may also be protective against fentanyl overdose deaths [27].  
21 These findings suggest that methadone is a valuable tool for treating OUD in fentanyl  
22 users.  
23  
24  
25  
26

27 There have been over one-million drug overdoses in the US since the start of the  
28 opioid epidemic [28]. The COVID-19 pandemic has placed tremendous stress on the  
29 healthcare system including the access to providers and availability of OUD treatments.  
30 Between 2019 and 2020, there was a +48.8% increase in overdose mortality among  
31 Black people, compared to +26.3% among White people [29]. Moreover, from April  
32 2020 to April 2021, the number of drug overdoses in the US exceeded one-hundred  
33 thousand, a +28.5% increase over the previous year [30]. With a +60% rise in  
34 overdoses compared to the previous year, May 2020 became the deadliest month on  
35 record [31].  
36  
37  
38

39 A cross-sectional study, conducted from May to June 2020 in the US and  
40 Canada, found that new patients wishing to initiate methadone treatment were faced  
41 with a barrier in 20% of clinics [32]. Similarly, prior to the pandemic, both methadone  
42 and buprenorphine-based OTPs were found to be effective in US jails and prisons.  
43 However, following the pandemic, some of these OTPs have been expanded while  
44 others were discontinued [33-35].  
45  
46

47 This study obtained data from the Drug Enforcement Administration's (DEA)  
48 Automated Reports and Consolidated Ordering System (ARCOS), a federal program  
49 established by the 1970 Controlled Substances Act, to monitor the distribution of DEA  
50 controlled substances from various sources including retail pharmacies, hospitals,  
51 practitioners, teaching institutions, mid-level practitioners, and OTPs [36]. Previous  
52 pharmacoepidemiologic studies have also utilized the ARCOS database [37-41]. It is  
53 important to note that ARCOS does not provide information on the number of patients  
54 receiving methadone. This caveat is important because it prevents an accurate  
55  
56  
57  
58  
59  
60

1  
2  
3 representation of the amount of methadone used for each OUD patient. However,  
4 federally funded OTPs record number of patients receiving treatment, which could be a  
5 useful resource in understanding the true scale of the OUD epidemic in the US and the  
6 effectiveness of treatment efforts. The Substance Abuse Mental Health Services  
7 Administration's (SAMHSA) National Survey of Substance Abuse Treatment Services'  
8 (N-SSATS) annual report provides national data regarding alcohol and drug abuse  
9 facilities [42]. The number of patients receiving methadone for OUD decreased by  
10 almost one-quarter (-23.7%) from 2019 (408,550) to 2020 (311,531) [42] (Supplemental  
11 Figure 1).  
12  
13  
14

15 In addition to ARCOS, Medicaid's State Drug Utilization Data (SDUD) database  
16 was used in this study [43]. Medicaid is a program at the federal and state level which  
17 functions to aid in covering healthcare costs for patients with limited resources [44].  
18 Medicaid.gov publishes all prescription drugs covered by Medicaid every year for all 50  
19 states and the District of Columbia (DC) in the SDUD database. The State Health  
20 Official Letter, released on December 30, 2020, states that the SUPPORT Act of 2018  
21 mandates the inclusion of Medicaid coverage for MOUD for all eligible patients with  
22 OUD. Subsequently, the Continuing Appropriations Act of 2021, which added to the  
23 SUPPORT Act, requires rebates on methadone and other MOUD starting from October  
24 1, 2020, to September 30, 2025. [45, 46]. However, not all states have equal coverage  
25 of medications, which can lead to discrepancies in the prescription numbers reflected by  
26 the SDUD. There is variation among states regarding methadone coverage, which in  
27 turn affects prescribing methadone patterns [47].  
28  
29  
30  
31

32 This manuscript aims to address the paucity of research on methadone for OUD  
33 treatment over the past decade and during the COVID-19 pandemic. The impact of  
34 COVID-19-related policies on individuals with OUD is poorly understood, and this  
35 manuscript seeks to shed light on this important area of research. The use of both  
36 ARCOS and SDUD databases provide a comprehensive picture of the distribution and  
37 utilization of methadone for the OUD treatment over the past decade. Together, it is  
38 critical to examine the changes in methadone distribution during the COVID-19  
39 pandemic to determine whether there are national or regional barriers to accessing this  
40 evidence-based pharmacotherapy.  
41  
42  
43  
44  
45  
46  
47  
48  
49  
50  
51  
52  
53  
54  
55  
56  
57  
58  
59  
60



## Materials and Methods

The quantities of methadone distributed (in grams) per state were obtained from the ARCOS yearly drug summary reports for the years 2010, 2015, 2019, 2020 and 2021. Methadone distributed to OTPs, in the ARCOS database, was classified as an OUD treatment which excluded all methadone for pain. The number of OTPs per state were also obtained from ARCOS for 2010, 2015, 2019, 2020 and 2021. The state population estimates, including DC, were derived from the US Census Bureau's Annual Estimates of the Resident Population for the US [48]. The US Territories were examined elsewhere and were not included in Figures 1-5 [49]. Medicaid data was collected in the year 2020 for all 50 states and DC using a filtered download from the SDUD [43]. This data from Medicaid was the methadone reimbursements for use for OUD. National Drug Codes (NDC) of formulations that are primarily used for OUD are provided in the Supplemental Table 2. The number of methadone prescriptions per state was divided by the number of Medicaid enrollees per state in 2020. Three states—Virginia, Montana, and Iowa were excluded from the results due to being outliers (10-112K prescriptions/100K enrollees) which presumably reflected a Medicaid data error (mean 475.4 prescriptions/100K enrollees for the remaining 48 states). This study was approved by the institutional review boards of the University of New England and Geisinger.

The percent change in methadone distribution for OUD was compared between states for time spans of ten years, five years and one year respectively. For all 50 states, the milligrams of methadone per person for the years 2010, 2015, 2020 was calculated. This this calculation is the “amount distributed” per year in the following equation: percentage change = (Amount distributed in later year - Amount distributed in earlier year) / Amount distributed in earlier year \* 100. Data were analyzed through one-way repeated measures ANOVA with Sidak corrections to examine the effects of OTPs per one million persons per state in 2010, 2015, 2020, 2021. Data were similarly analyzed to examine the effects of mg of methadone per person per state in 2010, 2015, 2019, 2020, and 2021. Heatmaps were created using JMP version 16.2.0. Figures and data analysis were completed using Microsoft Excel, GraphPad Prism version 9.4.0, and Systat version 13.1.

### *Patient and Public Involvement*

None.

## Results

### ARCOS

Overall, the total volume of methadone distributed to OTPs in the US increased over the last decade from 8.62 metric tons in 2010 to 10.88 tons in 2015 (+26.3%), and to 13.03 tons in 2020 (+19.7%), reflecting an increase in distribution to the majority of

1  
2  
3 states. Results of the one-way repeated measures ANOVA revealed a significant main  
4 effect of time on mg of methadone per person per state ( $F(4, 200)=24.535$ ,  $P < 0.001$ ).  
5 Specifically, the average percent change in state distribution of methadone for OUD  
6 from 2010 to 2020 significantly increased by +96.96% ( $SD=146.64\%$ , Sidak post hoc  $P$   
7  $< 0.001$ ), with forty-three states showing an increase, five states a decrease (DC,  
8 Florida, Maine, Tennessee, and West Virginia), and three states showing no change  
9 (North Dakota, South Dakota, and Wyoming). There was also a significant increase in  
10 mg of methadone per person per state (+61.8%) from 2010 to 2019 ( $P < 0.001$ ) and by  
11 +61.0% from 2010 to 2020 ( $P < 0.001$ ). From 2010 to 2020, there was a large ( $> 1.5$   
12 SDs) increase in Vermont (+353.67%), and significant elevations ( $> 1.96$  SDs,  $P < 0.05$ )  
13 in Alaska (+421.11%) and Montana (+897.02%) relative to the average (Figure 1).  
14 These findings show that methadone distribution in the US has increased significantly  
15 over the past decade, with most states showing increases.  
16  
17  
18  
19

20 Examination of 2015 relative to 2020 revealed the national average distribution of  
21 methadone for OUD increased significantly by +26.22% ( $SD = 50.38\%$ ,  $P < 0.001$ ), with  
22 thirty-eight states increasing but eleven states decreasing (Alabama, Florida, Georgia,  
23 Kansas, Maine, Minnesota, Missouri, Nebraska, New Hampshire, South Dakota, and  
24 Texas). There were significant increases ( $P < 0.05$ ) in Alaska (+135.34%) and  
25 Mississippi (+311.48%) relative to the national mean (Figure 2). In conclusion,  
26 methadone distribution increased from 2015 to 2020, with significant increases in most  
27 states.  
28  
29

30 Based on a one-way repeated measures ANOVA with Sidak post hoc from 2019  
31 to 2020 (i.e., pre- to post- COVID-19 pandemic), the distribution of methadone was  
32 stable (-0.091%,  $SD = 10.81\%$ ). Slightly over half (twenty-eight) of states showed an  
33 increase and twenty-two states exhibited a decrease. No significant ( $P = 1.000$ )  
34 differences were found between 2019 and 2020. Examination of specific states revealed  
35 an increase in Kentucky (+18.68%) and a significant increase ( $P < 0.05$ ) in Ohio  
36 (+26.02%) relative to the national mean. In contrast, there were appreciable decreases  
37 in Nebraska (-16.6%), South Dakota (-17.27%), and Mississippi (-20.53%), and  
38 significant decreases ( $P < 0.05$ ) in Alabama (-21.96%), New Hampshire (-24.13%) and  
39 Florida (-28.97%) relative to the national mean (Figure 3). Overall, the distribution in  
40 was stable from 2019 to 2020, with significant increases in two states and decreases in  
41 three states.  
42  
43  
44  
45

46 Examination of 2019 to 2021, a wider pre- to post COVID-19 pandemic timeline,  
47 the distribution of methadone to OTPs showed a decline (-5.15%,  $SD = 19.14\%$ ), but no  
48 significant difference ( $P = 0.491$ ). Eighteen states showed an increase while thirty-one  
49 states showed a decrease. Ohio (+47.53%) had a significant increase ( $P < 0.05$ ) relative  
50 to the national mean. In contrast, there was an appreciable decrease in Mississippi (-  
51 42.53%), and significant decreases ( $P < 0.05$ ) in Alabama (-44.27%), Nebraska (-  
52 47.96%), New Hampshire (-52.99%) and Florida (-54.61%) relative to the national mean  
53 (Figure 4). However, distribution in 2021 was -5.69% lower than 2019 and -5.71% lower  
54  
55  
56  
57  
58  
59  
60

1  
2  
3 than 2020 (Supplemental Figure 2A). In summary, methadone distribution declined from  
4 2019 to 2021, with significant decreases in four states and increase in one state.  
5

6 The average methadone distribution in the US for OUD was 43.75 mg/person  
7 (SD = 35.01) in 2021. There was significantly elevated methadone distributed in Rhode  
8 Island (155.13 mg/person), Delaware (147.27 mg/person), Connecticut (126.66  
9 mg/person), and Vermont (125.06 mg/person) relative to the national mean (43.75,  $P <$   
10 0.05). Therefore, the distribution was relatively uniform in 2021, with significant  
11 elevations in Rhode Island, Delaware, Connecticut, and Vermont.  
12  
13

14 The total number of OTPs distributing methadone in the US increased +18.6%  
15 from 2010 (1,139) to 2015 (1,351) and peaked in 2021 (1,738, Supplemental Figure  
16 2B). In comparison, the number of pharmacies distributing buprenorphine (49,041) was  
17 43.1-fold greater than OTPs distributing methadone in 2010. However, this ratio  
18 decreased to 33.3-fold in 2021. Results of the repeated measures ANOVA revealed a  
19 significant interaction between time and OTPs per one million persons per state ( $F(3,$   
20 150)=38.067,  $P <$  0.000). The number of OTPs per one million persons per state  
21 significantly increased ( $P <$  0.0001) from 2010 to 2021. In addition, one-way repeated  
22 measures ANOVA with Sidak post hoc revealed 2010 to 2015 ( $P <$  0.0001), 2010 to  
23 2020 ( $P <$  0.0001), 2015 to 2020 ( $P <$  0.0001), and 2015 to 2021 ( $P <$  0.0001) were  
24 each significantly different. The number of OTPs per 1 million persons per state in 2020  
25 relative to 2021 did not significantly increase ( $P =$  0.683). Twenty states had fewer  
26 OTPs in 2021 relative to 2010, 2015, or 2020 (Alabama, Florida, Georgia, Maine,  
27 Maryland, Minnesota, Mississippi, Montana, Nebraska, New Hampshire, New Mexico,  
28 New York, North Carolina, Oklahoma, South Carolina, South Dakota, Texas, Utah,  
29 Vermont, and Washington). One state (Wyoming) did not have a single OTP (Figure 5,  
30 Supplemental Table 3). To sum up, the number of OTPs distributing methadone  
31 increased significantly from 2010 to 2021 but plateaued in 2021. The number of OTPs  
32 per million persons per state also increased significantly, but there was no significant  
33 increase from 2020 to 2021.  
34  
35  
36  
37  
38  
39

#### 40 *Medicaid*

41  
42 The SDUD database showed considerable variation in methadone prescribing  
43 between states and regions for patients covered under Medicaid (mean = 475.39, SD =  
44 1097.78 with four states having values of 0). The top four states (Wisconsin,  
45 Tennessee, Oregon, and Vermont) accounted for 64.03% of all methadone covered by  
46 Medicaid in 2020 (Supplemental Figure 3). Four states reporting zero values suggest  
47 that some data may be missing from the SDUD database. In conclusion, methadone  
48 prescribing for Medicaid patients varied widely across states, with the top four states  
49 disproportionately accounting for over 60% of all prescriptions.  
50  
51  
52  
53  
54  
55  
56  
57  
58  
59  
60

## Discussion

The key finding of this study was that the pronounced and significant increase in methadone distribution to OTPs for OUD over the past decade has reversed with non-significant decreases (-0.09%) from 2019 to 2020 and (-5.15%) from 2019 to 2021. There were significant increases in the number of OTPs per one million persons per state over the past decade, but no significant increases over the COVID-19 pandemic period from 2019 compared to 2021 [34]. These findings point to the necessity for more OTPs to combat the escalating OUD problem with this evidence-based pharmacotherapy [8]. Twenty states showed a reduction in OTPs from 2010 to 2021 which could be due to funding issues or policies for OTPs in these states [50].

Examination of how the COVID-19 pandemic affected OUD treatment from 2019 to 2021 revealed that methadone distribution to OTPs did not increase significantly. However, a subtle but statistically significant increase (+5.0%) was observed in the number of poison control reports of intentional methadone exposure during this period [51]. In addition, the National Center for Health Statistics (NCHS) of the Centers for Disease Control and Prevention (CDC) reported that drug overdose mortality increased by +31% between 2019 and 2020. Nonetheless, the rate of methadone overdose deaths remained low with no significant increase in this report, suggesting no change in nonprescribed methadone use during the COVID-19 pandemic [52]. Conversely, others have reached the opposite conclusion [10].

Since OTPs were not distributing additional methadone MMEs during the COVID-19 pandemic, and overdose rates continue to surge, this emphasizes the need for expanded access to methadone treatment and reduced treatment barriers. Individuals who overdose on illicit and prescription opioids including heroin and fentanyl may be prime candidates for methadone treatment. Additional solutions can include allowing for earlier access to take home methadone from OTPs and allowing for patients to obtain methadone prescriptions from community pharmacies after a period of OUD stability, which is currently prohibited by law outside of an OTP [53]. Another uncommonly employed solution is to provide travelling methadone treatment on a daily route which can allow observed administration and decrease need for transportation to a further location [54]. This would be particularly beneficial for rural areas but also useful for zip codes with a limited number of methadone programs.

Despite methadone being an evidence-based treatment for OUD with better patient retention compared to buprenorphine [8], only forty-one states in 2018 had methadone covered under Medicaid [47]. Twelve states located predominantly in the South and Midwest opted to not expand Medicaid, leaving patients in these areas vulnerable to inaccessible treatment [55, 56]. States where methadone was not covered included: Arkansas, Idaho, Kansas, Kentucky, Louisiana, Nebraska, North Dakota, South Carolina, Tennessee, and Wyoming [47]. It was also found that only four states with 5.40% of the US population, accounted for the preponderance (64.03%) of prescriptions. Although this lab has prior experience with Medicaid in various capacities

1  
2  
3 (clozapine, esketamine, etc.) the data acquired should be viewed with substantial  
4 skepticism unless subsequently verified by others, as some states may not have  
5 uploaded all their methadone data [57, 58]. This pronounced disparity indicates that  
6 patients in certain states and regions have appreciably better access to this evidence-  
7 based treatment for OUD than others [2].  
8  
9

10 This study suggests the importance of policy change as there is a pressing need  
11 for additional access to OUD therapy, specifically methadone treatment, in the US. Over  
12 400,000 people in the US received methadone from an OTP pre-pandemic, 2019, with  
13 over 90% located in urban areas, making it challenging for rural patients to receive their  
14 medication [58-61]. SAMHSA released guidelines in March 2020 allowing the regulatory  
15 authorities of all states to request blanket exceptions to allow OTP patients to take  
16 home doses of methadone and buprenorphine [62]. These guidelines were extended in  
17 November 2021. However, the number of patients receiving methadone declined in the  
18 first year of the COVID-19 pandemic by one-quarter [35]. Many providers and public  
19 health researchers are calling for these take home dosage rules to be continued post-  
20 pandemic [63, 64], although others that evaluated the number of overdoses involving  
21 methadone are more cautious [10, 65].  
22  
23  
24  
25

26 The number of pharmacies which dispensed buprenorphine was 34-fold greater  
27 in 2021 than the number of OTPs that dispensed methadone, indicating that  
28 buprenorphine is more easily accessible and available than methadone. On the other  
29 hand, the volume of methadone distributed by weight from OTPs was 2.4-fold higher  
30 than buprenorphine from pharmacies, hospitals, and OTPs combined, (Supplemental  
31 Table 1). It is currently curious that there are more restrictions in the US for prescribing  
32 methadone than for other Schedule II substances like fentanyl or oxycodone.  
33 Overcoming the “Not in my Backyard” (NIMBY) stigma surrounding OTPs is not a trivial  
34 undertaking and is exacerbated by a common lack of understanding of OUD as a  
35 chronic disease [48]. It will require a paradigm shift to allow supervised administration in  
36 pharmacies, primary care offices, mobile units as are common in other Western nations,  
37 and even video observed therapy [18, 32, 66, 67].  
38  
39  
40

41 Expanding the role of specialty trained pharmacists by expanding the MOUD  
42 regulations to allow provider-delegated induction with buprenorphine in pharmacies, can  
43 immediately increase access to MOUD [66-70]. According to the Consolidated  
44 Appropriations Act, 2023, which was passed on December 29, 2022, medical providers  
45 with a current DEA registration number are now able to prescribe buprenorphine for  
46 OUD without needing an X-DEA waiver if state law permits it [71]. Overall, this is  
47 important because it aims to remove existing barriers to OUD treatment and increase  
48 access to care for individuals who need it.  
49  
50  
51

52 During the pandemic, daily visits to a methadone clinic were a health hazard and  
53 regulations governing the clinical work of methadone clinics were changed.  
54 Nonetheless, methadone remains more challenging for patients to access on many  
55 counts. Additionally, the regulatory burden surrounding methadone maintenance means  
56  
57  
58  
59  
60

1  
2  
3 that creating clinics requires substantially more time, money, and effort than even  
4 specialty addiction medicine clinics where buprenorphine can be prescribed. This  
5 means that there will always be fewer methadone clinics than buprenorphine  
6 prescribers. This difference between the two medications may account for some of the  
7 change in methadone use described in this article. With the removal of the X-DEA  
8 waiver requirement for buprenorphine prescription, and the expansion of the exception  
9 to the Ryan Haight law [72] which governs prescribing scheduled drugs over  
10 telemedicine, it is reasonable to expect that an increasing proportion of people who  
11 have OUD will receive buprenorphine rather than methadone. Despite lack of robust  
12 head-to-head trials [8], methadone has long been considered to have utility when other  
13 MOUDs have been ineffective and is recommended for patients who cannot tolerate  
14 initiation or ongoing treatment with buprenorphine. Thus, there remains a strong need  
15 for wide and equitable methadone availability during this ever-worsening opioid crisis  
16 [73].  
17  
18  
19  
20

21 The non-homogenous distribution within states should also be a concern for  
22 policy makers. The paucity of methadone OTPs across rural states like Wyoming (253k  
23 km<sup>2</sup>), South Dakota (200k km<sup>2</sup>), and Nebraska (200 km<sup>2</sup>) is an important finding.  
24 However, prior research found that another rural state, Maine, which ranked tenth in the  
25 US, had three-OTPs in a single thirty-thousand-person city (Bangor) and none in other  
26 areas in northern Maine [60]. Providing funding opportunities to train Addiction Medicine  
27 Fellows who will focus on rural care post-graduation can result in a pipeline of addiction  
28 medicine leaders to many areas of the US which are most in need.  
29  
30  
31

32 The strengths of this report include novel and timely data from ARCOS which is  
33 comprehensive for both distribution and number of distributors. This investigation  
34 extends upon earlier research both pre [5] and post COVID-19 pandemic [40, 41].  
35 Potential caveats and limitations stem from the fact that methadone distribution is  
36 reported in ARCOS by weight rather than prescriptions per individual at an OTP. It is  
37 notable that ARCOS reporting does not differentiate between pharmacological  
38 formulations. Further, this pharmacoepidemiological report does not contain detailed  
39 patient-level information including medical comorbidities or social determinants of  
40 health. These contributions should be further explored in future investigations with  
41 electronic medical records. Because SAMHSA's N-SSATS annual reports contain data  
42 on the total number of patients receiving methadone at OTPs, they could complement  
43 the ARCOS data and allow for a more detailed analysis of opioid prescribing patterns  
44 and patient outcomes (Supplemental Figure 1) [42]. Importantly, other  
45 pharmacoepidemiological research that compared another Schedule II substance from  
46 ARCOS to a state Prescription Drug Monitoring Program identified a high  
47 correspondence ( $r = +.985$ ) [39]. The inclusion of Medicaid data also, at least partially,  
48 offsets this concern. However, the substantial state-level inhomogeneity of methadone  
49 as reported by Medicaid should be viewed carefully and warrants further study. A  
50 reported value of zero for four state could possibly be explained by factors such as  
51 states not reporting data or changes in how states report this data over time. Future  
52  
53  
54  
55  
56  
57  
58  
59  
60

1  
2  
3 research should also be focused on determining which patient subgroups were most  
4 impacted by the reversal in methadone distribution. As the number of pharmacies  
5 nationally distributing buprenorphine decreased (-4.7%) from 2019 to 2021, further  
6 research should evaluate if both methadone and buprenorphine continue to be  
7 underutilized in the post-COVID-19 pandemic period [74] (Supplemental Table 1). This  
8 research is essential to guide policy and practice efforts to ensure that all individuals  
9 with OUD have access to effective MOUD treatment options.  
10  
11

## 12 **Conclusions**

13  
14 In conclusion, this study highlights the trend over the past decade of methadone  
15 distribution for OUD in the US and disparities in access to OTPs in rural and western  
16 states. The findings of this study have the potential to guide improvements in OUD  
17 treatment policies at the state level, by providing valuable information on disparities in  
18 access to OTPs that could lead to the implementation of more permanent solutions. The  
19 many policy accommodations to COVID-19 may present an important opportunity to  
20 determine which factors most impact the accessibility, adherence, safety, and efficacy  
21 of methadone. Policy solutions that increase access to MOUD are urgently needed to  
22 continue to address the ongoing opioid epidemic.  
23  
24  
25  
26  
27  
28  
29  
30  
31  
32  
33  
34  
35  
36  
37  
38  
39  
40  
41  
42  
43  
44  
45  
46  
47  
48  
49  
50  
51  
52  
53  
54  
55  
56  
57  
58  
59  
60

## Figure Captions

**Figure 1.** Percent change from 2010 to 2020 in methadone distribution as reported by the Drug Enforcement Administration's Automated Reports and Consolidated Ordering System for Opioid Use Disorder. Percent change between 1.5 SDs and 1.959 SDs from the mean (+96.96%, SD = 146.64%), indicated with a #. Percent change  $> \pm 1.96$  SD from the mean was considered significant (\*P < 0.05).

**Figure 2.** Percent change from 2015 to 2020 in methadone distribution as reported by the Drug Enforcement Administration's Automated Reports and Consolidated Ordering System for Opioid Use Disorder. Percent change between 1.5 SDs and 1.959 SDs from the mean (+26.22%, SD = 50.38%), indicated with a #. Percent change  $> \pm 1.96$  SD from the mean was considered significant (\*P < 0.05).

**Figure 3.** Percent change from 2019 to 2020 in methadone distribution as reported by the Drug Enforcement Administration's Automated Reports and Consolidated Ordering System for Opioid Use Disorder. Percent change between 1.5 SDs and 1.959 SDs from the mean (-0.09%, SD 10.81), indicated with a #. Percent change  $> \pm 1.96$  SD from the mean was considered significant (\*P < 0.05).

**Figure 4.** Percent change from 2019 to 2021 in methadone distribution as reported by the Drug Enforcement Administration's Automated Reports and Consolidated Ordering System for Opioid Use Disorder. Percent change between 1.5 SDs and 1.959 SDs from the mean (-5.15%, SD 19.14), indicated with a #. Percent change  $> \pm 1.96$  SD from the mean was considered significant (\*P < 0.05).

**Figure 5.** Number of opioid treatment programs per 1 million persons per state all significantly (P < 0.0001) different from 2010, 2015, 2020 and 2021. The twenty states that decreased in 2021 relative to 2010, 2015 or 2020 are indicated with a "d". DC: District of Columbia.



## Supplemental Materials

**Supplemental Figure 1.** Number of patients receiving methadone for opioid use disorder in the United States per year as reported by Substance Abuse and Mental Health Services Administration's National Survey of Substance Abuse Treatment Services data. The years 2014 and 2018 were not available and were omitted.

**Supplemental Figure 2.** Distribution in kg (A) and number of buyers and registrants (B) in Opioid Treatment Programs (OTP) and pharmacies (pharm, buprenorphine only) for methadone and buprenorphine as reported to the United States Drug Enforcement Administration's Automated Reports and Consolidated Orders system for the fifty states, Washington DC, and the US Territories. Methadone in 2021 (12.4 metric tons) was 5.69% lower than 2019 (13.1 metric tons) and 5.71% below 2020 (13.1 metric tons). Methadone by weight was 2.49-fold greater than buprenorphine from pharmacies and OTPs in 2021. The number of pharmacies distributing buprenorphine was 33.3 to 47.3-fold greater than the number of OTPs distributing methadone from 2010 to 2021.

**Supplemental Figure 3.** Methadone prescriptions, per 100K Medicaid patients, for 48 US states, and Washington DC.

1  
2  
3  
4  
5  
6  
7  
8  
9  
10  
11  
12  
13  
14  
15  
16  
17  
18  
19  
20  
21  
22  
23  
24  
25  
26  
27  
28  
29  
30  
31  
32  
33  
34  
35  
36  
37  
38  
39  
40  
41  
42  
43  
44  
45  
46  
47  
48  
49  
50  
51  
52  
53  
54  
55  
56  
57  
58  
59  
60

**Acknowledgments:** Thank you to Iris Johnston for providing access to journal articles, and Olapeju Simoyan, MD for providing feedback. GraphPad Prism provided by grant NIH/NIEHS T32 ES007060-31A1.

For peer review only

1  
2  
3 **Contributorship Statement:** Conceptualization, Amy Kennalley and Brian Piper; Data  
4 curation, Amy Kennalley and Jessica Fanelli; Formal analysis, Amy Kennalley;  
5 Investigation, Amy Kennalley; Methodology, Brian Piper; Project administration,  
6 Kenneth McCall; Supervision, Brian Piper; Visualization, Amy Kennalley; Writing –  
7 original draft, Amy Kennalley; Writing – review & editing, Jessica Fanelli, John Furst Jr.,  
8 Nicholas Mynarski, Margaret Jarvis, Stephanie Nichols, Kenneth McCall and Brian  
9 Piper.  
10  
11

12 **Competing Interests Statement:** BJP is supported by the Health Resources Services  
13 Administration (D34HP31025), the Pennsylvania Academic Clinical Research Center,  
14 and was (until 12/31/2021) part of an osteoarthritis research team supported by Pfizer  
15 and Eli Lilly. MAJ received consulting fees from SAMHSA, expert testimony fees, stock  
16 through US Preventative Medicine, and support for meetings through the American  
17 Board of Preventive Medicine, Addiction Medicine Examination Subcommittee, and the  
18 American Society of Addiction Medicine Board of Directors. MAJ also participates in  
19 leadership roles in the American Society of Addiction Medicine Board of Directors,  
20 Quality Improvement Council, and ASAM Criteria Steering Committee. SDN is a  
21 consultant for the SAMHSA funded Opioid Response Network providing 1:1 and  
22 didactic group provider education and is core faculty for the Maine Medical Center/VA  
23 Addiction Medicine Physician Fellowship Program. SDN also received payment for  
24 speaking about buprenorphine at the Maine Association of Psychiatric Physicians  
25 meeting and the American Association of Psychiatric Pharmacists. In addition, SDN  
26 receives support by employer at UNE to attend meetings and is supported by Lunder-  
27 Dineen Time to Ask Program alcohol advisory program to travel to the MGH SUD  
28 conference in Florida and to the American Society of Addiction Medicine meeting to  
29 present. She has also participated on advisory boards for Maine Medical Professions  
30 Health Program, Lunder Dineen Time to Ask, and Co-Occurring Collaborative Serving  
31 Maine. Lastly, she serves as leadership on the Maine Prescription Monitoring Program  
32 Committee. The other authors have no disclosures.  
33  
34  
35  
36  
37  
38

39 **Funding Statement:** This research received no specific grant from any funding agency  
40 in the public, commercial or not-for-profit sectors.  
41

42 **Data Sharing Statement:** Publicly available datasets were analyzed in this study. This  
43 data can be found here: [<https://www.deadiversion.usdoj.gov/arcos/>]  
44 [[https://www.medicaid.gov/medicaid/prescription-drugs/state-drug-utilization-](https://www.medicaid.gov/medicaid/prescription-drugs/state-drug-utilization-data/index.html)  
45 [data/index.html](https://www.medicaid.gov/medicaid/prescription-drugs/state-drug-utilization-data/index.html)].  
46  
47

48 **Ethics Approval Statement:** The Binghamton University IRB issued  
49 (STUDY00003951) this research project an Exempt approval waived under Section 45  
50 CFR 46 104(d)(4) of the Code of Federal Regulations.  
51

52 **Informed Consent Statement:** Not applicable.  
53  
54  
55  
56  
57  
58  
59  
60

## References

1. Peterkin, A.; Laks, J.; Weinstein, Z.M. Current best practices for acute and chronic management of patients with Opioid Use Disorder. *Med Clin North Am.* 2022, 106(1), 61–80; DOI:10.1016/j.mcna.2021.08.009.
2. Anderson, I.B.; Kearney, T.E. Use of methadone. *West J Med* 2000, 172(1), 43–46; DOI: 10.1136/ewjm.172.1.43.
3. Toce, M.S.; Chai, P.R.; Burns, M.M.; Boyer, E.W. Pharmacologic treatment of Opioid Use Disorder: A review of pharmacotherapy, adjuncts, and toxicity. *J Med Toxicol* 2018, 14(4), 306–322; DOI: 10.1007/s13181-018-0685-1.
4. Mauro, P.M.; Gutkind, S.; Annunziato, E.M.; Samples, H. Use of Medication for Opioid Use Disorder Among US Adolescents and Adults With Need for Opioid Treatment, 2019. *JAMA Netw Open.* 2022, 5(3), e223821; DOI:10.1001/jamanetworkopen.2022.3821.
5. Kennalley, A.L.; Furst, J.A.; Mynarski, N.J.; McCall, K.L.; Piper, B.J. Methadone distribution increased from 2010 to 2019 for Opioid Use Disorder treatment in the US. *MedRxiv* 2021, DOI:10.1101/2022.03.09.22272154.
6. Substance Abuse Mental Health Services Administration. Available online: <https://www.samhsa.gov/sites/default/files/otp-guidance-20200316.pdf> (Accessed on 15 February 2022).
7. Krawczyk, N.; Jent, V.; Hadland, S.E.; Cerdá, M. Utilization of medications for Opioid Use Disorder across US states: Relationship to treatment availability and overdose mortality. *J. Addict. Med.* 2022, 16(1), 114–117; DOI:10.1097/ADM.0000000000000820.
8. Mattick, R.P.; Breen, C.; Kimber, J.; Davoli, M. Methadone maintenance therapy versus no opioid replacement therapy for opioid dependence. *Cochrane Database Syst. Rev.* 2009, 2009(3), CD002209; DOI:10.1002/14651858.CD002209.pub2.
9. Jones, C.M.; Compton, W.M.; Han, B.; Baldwin, G.; Volkow, N.D. Methadone-involved overdose deaths in the US before and after federal policy changes expanding take-home methadone doses from opioid treatment programs. *JAMA Psychiatry* 2022, 79(9), 932–934; DOI:10.1001/jamapsychiatry.2022.1776.
10. Kaufman, D.E.; Kennalley, A.L.; McCall, K.L.; Piper, B.J. Examination of methadone involved overdoses during the COVID-19 pandemic. *Forensic Sci. Int.* 2023, in print.
11. Darracq, M.A.; Thornton, S.L. Respiratory depression following medications for opioid use disorder (MOUD)-approved buprenorphine product oral exposures; National Poison Database System 2003-2019. *Clin Toxicol (Phila).* 2021, 59(4), 303-312; DOI:10.1080/15563650.2020.1814318.
12. Centers for Disease Control and Prevention. Available online: <https://www.cdc.gov/nchs/nvss/index.htm> (accessed on 30 September 2023).
13. Pande, L.J.; Arnett, R.A.; Piper, B.J. An Examination of the Complex Pharmacological Properties of the Non-Selective Opioid Modulator Buprenorphine. *Pharmaceutics* 2023-in press.

14. Bahji, A.; Cheng, B.; Gray, S.; Stuart, H. Reduction in mortality risk with opioid agonist therapy: a systematic review and meta-analysis. *Acta Psychiatr Scand.* 2019, 140(4), 313-339; DOI:10.1111/acps.13088.
15. Heil, J.; Ganetsky, V.S.; Salzman, M.S.; Hunter, K.; Baston, K.E.; Carroll, G.; Ketcham, E.; Haroz, R. Attitudes on methadone utilization in the emergency department: A physician cross-sectional study. *West J Emerg Med* 2022, 23(3), 386–395; DOI:10.5811/westjem.2022.2.54681.
16. Lagisetty, P.A.; Ross, R.; Bohnert, A.; Clay, M.; Maust, D.T. Buprenorphine treatment divide by race/ethnicity and payment. *JAMA Psychiatry* 2019, 76(9), 979–981; DOI:10.1001/jamapsychiatry.2019.0876.
17. Hickman, M.; Steer, C.; Tilling, K.; Lim, A.G.; Marsden, J.; Millar, T.; Strang, J.; Telfer, M.; Vickerman, P.; Macleod, J. The impact of buprenorphine and methadone on mortality: a primary care cohort study in the United Kingdom. *Addiction (Abingdon, England)* 2018, 113(8), 1461–1476; DOI:10.1111/add.14188.
18. Calcaterra, S.L.; Bach, P.; Chadi, A.; Chadi, N.; Kimmel, S.D.; Morford, K.L.; Roy, P.; Samet, J.H. Methadone matters: What the United States can learn from the global effort to treat opioid addiction. *Gen Intern Med.* 2019, 34(6), 1039-1042; DOI:10.1007/s11606-018-4801-3.
19. Jones, C.M.; Byrd, D.J.; Clarke, T.J.; Campbell, T.B.; Ohuoha, C.; McCance-Katz E.F. Characteristics and current clinical practices of opioid treatment programs in the United States. *Drug Alcohol Depend.* 2019, 205, 107616; DOI:10.1016/j.drugalcdep.2019.107616.
20. Marsch L.A. The efficacy of methadone maintenance interventions in reducing illicit opiate use, HIV risk behavior and criminality: a meta-analysis. *Addiction* 1998, 93(4), 515–532; DOI:10.1046/j.1360-0443.1998.9345157.x.
21. Otiashvili, D.; Piralishvili, G.; Sikharulidze, Z.; Kamkamidze, G.; Poole, S.; Woody, G.E. Methadone and buprenorphine-naloxone are effective in reducing illicit buprenorphine and other opioid use, and reducing HIV risk behavior--outcomes of a randomized trial. *Drug Alcohol Depend.* 2013, 133(2), 376-382; DOI:10.1016/j.drugalcdep.2013.06.024.
22. Mattick, R.P.; Breen, C.; Kimber, J.; Davoli, M. Buprenorphine maintenance versus placebo or methadone maintenance for opioid dependence. *Cochrane Database Syst Rev.* 2014, (2), CD002207, DOI:10.1002/14651858.CD002207.pub4.
23. National Institute on Drug Abuse. Available online: <https://nida.nih.gov/publications/research-reports/medications-to-treat-opioid-addiction/overview> (accessed on 23 December 2022).
24. Presnall, N.J.; Butler, G.C.; Grucza, R.A. Consumer access to buprenorphine and methadone in certified community behavioral health centers: A secret shopper study. *J Subst Abuse Treat* 2022, 139, 108788; DOI:10.1016/j.jsat.2022.108788.

- 1
  - 2
  - 3
  - 4
  - 5
  - 6
  - 7
  - 8
  - 9
  - 10
  - 11
  - 12
  - 13
  - 14
  - 15
  - 16
  - 17
  - 18
  - 19
  - 20
  - 21
  - 22
  - 23
  - 24
  - 25
  - 26
  - 27
  - 28
  - 29
  - 30
  - 31
  - 32
  - 33
  - 34
  - 35
  - 36
  - 37
  - 38
  - 39
  - 40
  - 41
  - 42
  - 43
  - 44
  - 45
  - 46
  - 47
  - 48
  - 49
  - 50
  - 51
  - 52
  - 53
  - 54
  - 55
  - 56
  - 57
  - 58
  - 59
  - 60
25. Bromley, L.; Kahan, M.; Regenstreif, L.; Srivastava, A.; Wyman, J. Methadone treatment for people who use fentanyl: Recommendations. Available online: [www.metaphi.ca](http://www.metaphi.ca) (accessed 25 September 2023).
26. Saloner, B.; Whitley, P.; Dawson, E.; Passik, S.; Gordon, A.J.; Stein, B.D. Polydrug use among patients on methadone medication treatment: Evidence from urine drug testing to inform patient safety. *Addiction*. 2023, 118(8), 1549–1556; <https://doi.org/10.1111/add.16180>.
27. Stone, A.C.; Carroll, J.J.; Rich, J.D.; Green, T.C. One year of methadone maintenance treatment in a fentanyl endemic area: Safety, repeated exposure, retention, and remission. *J Subst Abuse Treat*. 2020; DOI: 10.1016/j.jsat.2020.108031.
28. Centers for Disease Control and Prevention. Available online: <https://www.cdc.gov/nchs/nvss/vsrr/drug-overdose-data.htm> (accessed on 22 February 2022).
29. Friedman, J.R.; Hansen, H. Evaluation of increases in drug overdose mortality rates in the US by race and ethnicity before and during the COVID-19 pandemic. *JAMA Psychiatry* 2022, 79(4), 379-381; DOI:10.1001/jamapsychiatry.2022.0004.
30. Centers for Disease Control and Prevention. Available online: [https://www.cdc.gov/nchs/pressroom/nchs\\_press\\_releases/2021/20211117.htm](https://www.cdc.gov/nchs/pressroom/nchs_press_releases/2021/20211117.htm) (accessed on 31 March 2022).
31. Friedman, J.; Akre, S. COVID-19 and the drug overdose crisis: Uncovering the deadliest months in the United States, January–July 2020. *Am J Public Health* 2021, 111(7), 1284-1291; DOI:10.2105/AJPH.2021.306256.
32. Joudrey, P.J.; Adams, Z.M.; Bach, P.; Van Buren, S.; Chaiton, J.A.; Ehrenfeld, L.; Guerra, M.E.; Gleeson, B.; Kimmel, S.D.; Medley, A.; Mekideche, W.; Paquet, M.; Sung, M.; Wang, M.; You Kheang, R.O.O.; Zhang, J.; Wang, E.A.; Edelman, E.J. Methadone access for Opioid Use Disorder During the COVID-19 pandemic within the United States and Canada. *JAMA Network Open* 2021, 4(7), e2118223; DOI: 10.1001/jamanetworkopen.2021.18223.
33. Bandara, S.; Kennedy-Hendricks, A.; Merritt, S.; Barry, C.L.; Saloner, B. Early effects of COVID-19 on programs providing medications for Opioid Use Disorder in jails and prisons. *J Addict Med* 2020, 14(5), e257-e260; DOI:10.1097/ADM.0000000000000718.
34. Bandara, S.; Kennedy-Hendricks, A.; Merritt, S.; Barry, C.L.; Saloner, B. Methadone and buprenorphine treatment in United States jails and prisons: lessons from early adopters. *Addiction* 2021, 116(12), 3473-3481; DOI:10.1111/add.15565.
35. Maine Department of Corrections. Available online: [https://www.maine.gov/corrections/sites/maine.gov.corrections/files/inline-files/MAT\\_Year\\_One\\_ReviewFinal.pdf](https://www.maine.gov/corrections/sites/maine.gov.corrections/files/inline-files/MAT_Year_One_ReviewFinal.pdf) (accessed on 19 October 2022).
36. [dataset] [36] U.S. Department of Justice Drug Enforcement Administration Diversion Control Division. Available online: <https://www.deadiversion.usdoj.gov/arcos/> (accessed on 4 October 2023).

- 1  
2  
3 37. Furst, J.A.; Mynarski, N.J.; McCall, K.L.; Piper, B.J. Pronounced regional  
4 disparities in United States methadone distribution. *Ann Pharmacother.* 2022,  
5 56(3), 271-279; DOI:10.1177/10600280211028262.  
6  
7 38. Kennalley, A.L.; Boureghda, Y.A.; Ganesh, J.G.; Watkins, A.M.; McCall, K.L.;  
8 Piper, B.J. Declining national codeine distribution in United States hospitals and  
9 pharmacies from 2011 to 2019. *MedRxiv* 2022,  
10 DOI:10.1101/2022.04.12.22273805.  
11  
12 39. Piper, B.J.; Shah, D.T.; Simoyan, O.M.; Mccall, K.L.; Nichols, S.D. Trends in  
13 medical use of opioids in the U.S., 2006–2016. *Am. J. Prev. Med.* 2021, 54(5),  
14 652–660; DOI:10.1016/j.amepre.2018.01.034.  
15  
16 40. Chen, A. Y.; Powell, D.; Stein, B. D. Changes in buprenorphine and methadone  
17 supplies in the US during the COVID-19 pandemic. *JAMA Network Open* 2022, 5  
18 (7), e2223708; DOI:10.1001/jamanetworkopen.2022.23708.  
19  
20 41. Peterman, N. J.; Palsgaard, P.; Vashi, A.; Vashi, T.; Kaptur, B. D.; Yeo, E.;  
21 Mccauley, W. Demographic and geospatial analysis of buprenorphine and  
22 methadone prescription rates. *Cureus* 2022, 14; DOI:10.7759/cureus.25477.  
23  
24 42. Substance Abuse and Mental Health Services Administration. Available online:  
25 [https://www.samhsa.gov/data/report/national-survey-substance-abuse-treatment-](https://www.samhsa.gov/data/report/national-survey-substance-abuse-treatment-services-n-ssats-2020-data-substance-abuse)  
26 [services-n-ssats-2020-data-substance-abuse](https://www.samhsa.gov/data/report/national-survey-substance-abuse-treatment-services-n-ssats-2020-data-substance-abuse) (accessed on 11 February 2023).  
27  
28 43. [dataset] [43] Medicaid.gov. Available online:  
29 [https://www.medicaid.gov/medicaid/prescription-drugs/state-drug-utilization-](https://www.medicaid.gov/medicaid/prescription-drugs/state-drug-utilization-data/index.html)  
30 [data/index.html](https://www.medicaid.gov/medicaid/prescription-drugs/state-drug-utilization-data/index.html) (accessed on 26 July 2022).  
31  
32 44. Chorniy, A.; Currie, J.; Sonchak, L. Exploding asthma and ADHD caseloads: The  
33 role of Medicaid managed care. *J. Health Econ.* 2018, 60, 1–15.  
34 DOI:10.1016/j.jhealeco.2018.04.002.  
35  
36 45. Medicaid.gov. (2020). Mandatory Medicaid State Plan Coverage of Medication-  
37 Assisted Treatment Available online: [https://www.medicaid.gov/federal-policy-](https://www.medicaid.gov/federal-policy-guidance/downloads/sho20005.pdf)  
38 [guidance/downloads/sho20005.pdf](https://www.medicaid.gov/federal-policy-guidance/downloads/sho20005.pdf) (accessed on 26 July 2022).  
39  
40 46. Saloner, B.; Stoller, K.B.; Barry, C.L. Medicaid coverage for methadone  
41 maintenance and use of opioid agonist therapy in specialty addiction treatment.  
42 *Psychiatr Serv.* 2016, 67(6), 676-679; DOI:10.1176/appi.ps.201500228.  
43  
44 47. Kaiser Family Foundation. Available online:  
45 <https://www.kff.org/infographic/medicaids-role-in-addressing-opioid-epidemic/>  
46 (accessed on 22 September 2022).  
47  
48 48. 40 United States Census Bureau. Available online:  
49 <https://www.census.gov/topics/population.html> (accessed on 23 January 2022).  
50  
51 49. Cabrera, F.F.; Gamarra, E.R.; Garcia, T.E.; Littlejohn, A.D.; Chinga, P.A.;  
52 Pinentel-Morillo, L.D.; Tirado, J.R.; Chung, D.Y.; Pande, L.J.; McCall, K.L.;  
53 Nichols, S.D.; Piper, B.J. Opioid distribution trends (2006–2017) in the US  
54 Territories. *PeerJ* 2019, 2019(1), 1–12; DOI:10.7717/peerj.6272.  
55  
56 50. Smith C.B. Socio-spatial stigmatization and the contested space of addiction  
57 treatment: remapping strategies of opposition to the disorder of drugs. *Social*  
58  
59

- 1  
2  
3 Science & Medicine (1982) 2010, 70(6), 859–866;  
4 DOI:10.1016/j.socscimed.2009.10.033.  
5  
6 51. Welsh, C.; Doyon, S.; Hart, K. Methadone exposures reported to poison control  
7 centers in the United States following the COVID-19-related loosening of federal  
8 methadone regulations. *Int J Drug Policy* 2022, 102, 103591;  
9 DOI:10.1016/j.drugpo.2022.103591.  
10  
11 52. Centers for Disease Control and Prevention. Available online:  
12 <https://www.cdc.gov/nchs/products/databriefs/db428.htm> (accessed on 23  
13 January 2022).  
14  
15 53. Bart, G.; Wastvedt, S.; Hodges, J.S.; Rosenthal, R. Did drug use increase  
16 following COVID-19 relaxation of methadone take-out regulations? 2020 was a  
17 complicated year. *J Subst Abuse Treat.* 2022, 133, 108590;  
18 DOI:10.1016/j.jsat.2021.108590.  
19  
20 54. Breve, F.; Batastini, L.; LeQuang, J.A.K.; Marcharndo, G. Mobile narcotic  
21 treatment programs: On the road again? *Cureus* 2022, 14(3), e23221;  
22 DOI:10.7759/cureus.23221.  
23  
24 55. Grissinger, M. Keeping patients safe from methadone overdoses. *P T* 2011,  
25 36(8), 462-466.  
26  
27 56. Kaiser Family Foundation. Available online: [https://www.kff.org/health-](https://www.kff.org/health-reform/state-indicator/state-activity-around-expanding-medicaid-under-the-affordable-care-act/?currentTimeframe=0&sortModel=%7B%22colId%22:%22Location%22,%22sort%22:%22asc%22%7D)  
28 [reform/state-indicator/state-activity-around-expanding-medicaid-under-the-](https://www.kff.org/health-reform/state-indicator/state-activity-around-expanding-medicaid-under-the-affordable-care-act/?currentTimeframe=0&sortModel=%7B%22colId%22:%22Location%22,%22sort%22:%22asc%22%7D)  
29 [affordable-care-](https://www.kff.org/health-reform/state-indicator/state-activity-around-expanding-medicaid-under-the-affordable-care-act/?currentTimeframe=0&sortModel=%7B%22colId%22:%22Location%22,%22sort%22:%22asc%22%7D)  
30 [act/?currentTimeframe=0&sortModel=%7B%22colId%22:%22Location%22,%22s](https://www.kff.org/health-reform/state-indicator/state-activity-around-expanding-medicaid-under-the-affordable-care-act/?currentTimeframe=0&sortModel=%7B%22colId%22:%22Location%22,%22sort%22:%22asc%22%7D)  
31 [ort%22:%22asc%22%7D](https://www.kff.org/health-reform/state-indicator/state-activity-around-expanding-medicaid-under-the-affordable-care-act/?currentTimeframe=0&sortModel=%7B%22colId%22:%22Location%22,%22sort%22:%22asc%22%7D) (accessed 22 September 2022).  
32  
33 57. Benito, R.A.; Michael H Gatusky, Mariah W Panoussi, Kenneth L McCall, Anisa S  
34 Suparmanian, Brian J Piper. Thirteen-fold variation between states in clozapine  
35 prescriptions to United States Medicaid patients. *medRxiv.* 2022;  
36 DOI:10.1101/2022.04.03.22273352.  
37  
38 58. Alexia G. Aguilar , Burke A. Beauregard , Christopher P. Conroy , Yashoda T.  
39 Khatiwoda , Shantia M. E. Horsford , Stephanie D. Nichols & Brian J. Piper  
40 (2023) Pronounced Regional Variation in Esketamine and Ketamine Prescribing  
41 to US Medicaid Patients, *Journal of Psychoactive Drugs*, DOI:  
42 10.1080/02791072.2023.2178558  
43  
44 59. The Pew Charitable Trusts. Available online:  
45 [https://www.pewtrusts.org/en/research-and-analysis/articles/2021/04/22/more-](https://www.pewtrusts.org/en/research-and-analysis/articles/2021/04/22/more-flexible-methadone-access-should-continue-post-pandemic)  
46 [flexible-methadone-access-should-continue-post-pandemic](https://www.pewtrusts.org/en/research-and-analysis/articles/2021/04/22/more-flexible-methadone-access-should-continue-post-pandemic) (accessed 31 March  
47 2022).  
48  
49 60. Hyde, T.F.; Bekoe-Tabiri, A.D.; Kropp Lopez, A.K.; Devia, L.G.; Gutierrez, B.D.;  
50 Lara, M.C.; Soto, A.R.; Kaufman, D.E.; Moran, M.T.; Simpson, K.J.; Shah, D.T.;  
51 Foster, M.; Desrosiers, C.E.; Hebert, J.; Nichols, S.D.; McCall, K.L.; Piper, B.J.  
52 County and demographic differences in drug arrests and controlled substance  
53 use in Maine. *J. Maine Med. Ctr.* 2021, 3; DOI:10.46804/2641-2225.1074.  
54  
55  
56  
57  
58  
59



61. Jehan, S.; Zahnd, W.E.; Wooten, N.R.; Seay, K.D. Geographic variation in availability of opioid treatment programs across U.S. communities. *J Addict Dis* 2023, DOI: 10.1080/10550887.2023.2165869.
62. Substance Abuse Mental Health Services Administration. Available online: <https://www.samhsa.gov/medication-assisted-treatment/statutes-regulations-guidelines/methadone-guidance> (accessed 15 February 2022).
63. Amram, O.; Amiri, S.; Panwala, V.; Lutz, R.; Joudrey, P.J.; Socias, E. The impact of relaxation of methadone take-home protocols on treatment outcomes in the COVID-19 era. *Am J Drug Alcohol Abuse* 2021, 47(6), 722-729; DOI:10.1080/00952990.2021.1979991.
64. Regulatory Studies Center. Available online: <https://regulatorystudies.columbian.gwu.edu/extending-pandemic-flexibilities-opioid-use-disorder-treatment> (accessed on 2 March 2022).
65. Kleinman, R.A.; Sanches, M. Methadone-involved overdose deaths in the United States before and during the COVID-19 pandemic. *Drug Alcohol Depend* 2023, 242, 109703; DOI:10.1016/j.drugalcdep.2022.109703.
66. Darnton, J.B.; Bhatraju, E.P.; Beima-Sofie, K.; Michaels, A.; Hallgren, K.A.; Soth, S.; Grekin, P.; Woolworth, S.; Tsui, J.I. "Sign Me Up": a qualitative study of video observed therapy (VOT) for patients receiving expedited methadone take-homes during the COVID-19 pandemic. *Addict Sci Clin Pract*, 2023, 18, 21; DOI:10.1186/s13722-023-00372-3.
67. Gibbons, J.B.; Stuart, E.A.; Saloner, B. Methadone on wheels-A new option to expand access to care through mobile units. *JAMA Psychiatry* 2022, 79(3), 187-188; DOI:10.1001/jamapsychiatry.2021.3716.
68. Peckham, A.M.; Ball, J.; Colvard, M.D.; Dadiomov, D.; Hill, L.G.; Nichols, S.D.; Tallian, K.; Ventricelli, D.J.; Tran, T.H. Leveraging pharmacists to maintain and extend buprenorphine supply for opioid use disorder amid COVID-19 pandemic. *Am J Health Syst Pharm* 2021, 78(7), 613-618; DOI:10.1093/ajhp/zxab003.
69. Substance Abuse and Mental Health Services Administration. Available online: <https://www.samhsa.gov/medications-substance-use-disorders/removal-data-waiver-requirement> (accessed on 1 February 2023).
70. Green, T.C.; Serafinski, R.; Clark, S.A.; Rich, J.D.; Bratberg, J. Physician-delegated unobserved induction with buprenorphine in pharmacies. *N Engl J Med*. 2023, 388(2), 185-186; DOI:10.1056/NEJMc2208055.
71. Congress.gov. Available online: <https://www.congress.gov/bill/117th-congress/house-bill/2617> (accessed on 11 February 2023).
72. American Psychiatric Association. Available online: <https://www.psychiatry.org/psychiatrists/practice/telepsychiatry/toolkit/ryan-haight-act> (accessed on 10 March 2023).
73. The Washington Post. Available online: <https://www.washingtonpost.com/health/2023/03/05/methadone-addiction-treatment-prescription/> (accessed on 10 March 2023).

1  
2  
3 74. Presnall, N.J.; Butler, G.C.; Gruzca, R.A. Consumer access to buprenorphine  
4 and methadone in certified community behavioral health centers: A secret  
5 shopper study. J Subst Abuse Treat 2022, 139, 108788;  
6 DOI:10.1016/j.jsat.2022.108788.  
7  
8  
9  
10  
11  
12  
13  
14  
15  
16  
17  
18  
19  
20  
21  
22  
23  
24  
25  
26  
27  
28  
29  
30  
31  
32  
33  
34  
35  
36  
37  
38  
39  
40  
41  
42  
43  
44  
45  
46  
47  
48  
49  
50  
51  
52  
53  
54  
55  
56  
57  
58  
59  
60

For peer review only

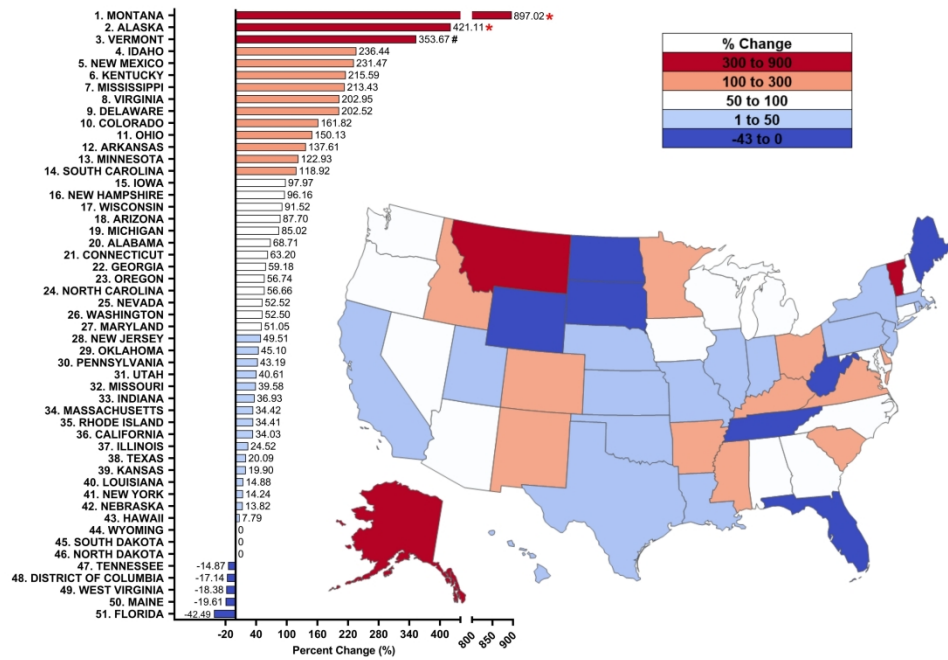

Percent change from 2010 to 2020 in methadone distribution as reported by the Drug Enforcement Administration's Automated Reports and Consolidated Ordering System for Opioid Use Disorder. Percent change between 1.5 SDs and 1.959 SDs from the mean (+96.96%, SD = 146.64%), indicated with a #. Percent change > ±1.96 SD from the mean was considered significant (\*P < 0.05).

141x102mm (600 x 600 DPI)

1  
2  
3  
4  
5  
6  
7  
8  
9  
10  
11  
12  
13  
14  
15  
16  
17  
18  
19  
20  
21  
22  
23  
24  
25  
26  
27  
28  
29  
30  
31  
32  
33  
34  
35  
36  
37  
38  
39  
40  
41  
42  
43  
44  
45  
46  
47  
48  
49  
50  
51  
52  
53  
54  
55  
56  
57  
58  
59  
60

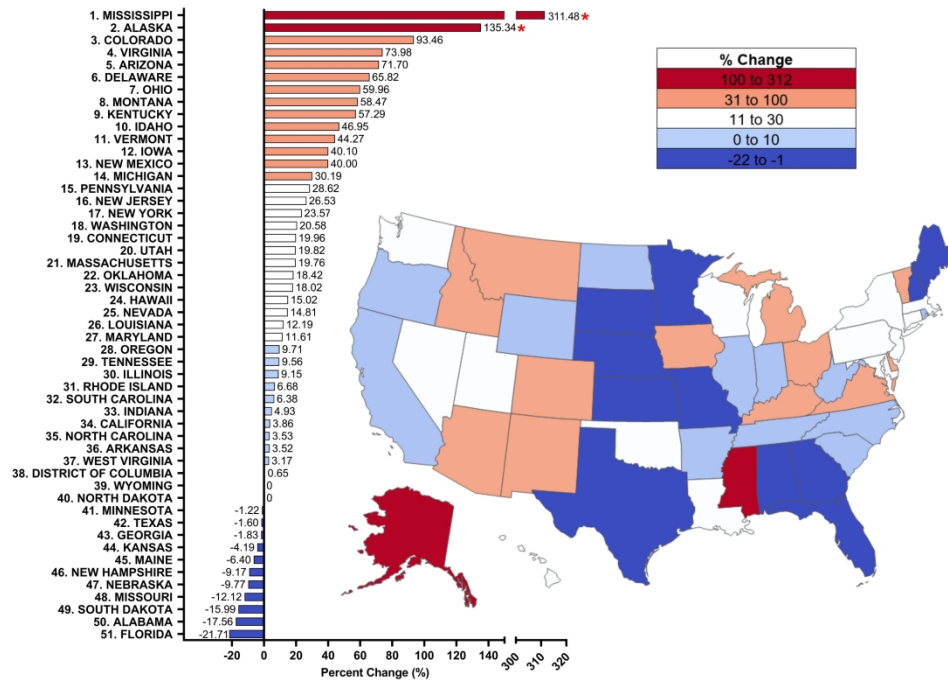

Percent change from 2015 to 2020 in methadone distribution as reported by the Drug Enforcement Administration's Automated Reports and Consolidated Ordering System for Opioid Use Disorder. Percent change between 1.5 SDs and 1.959 SDs from the mean (+26.22%, SD = 50.38%), indicated with a #. Percent change > ±1.96 SD from the mean was considered significant (\*P < 0.05).

142x103mm (600 x 600 DPI)

1  
2  
3  
4  
5  
6  
7  
8  
9  
10  
11  
12  
13  
14  
15  
16  
17  
18  
19  
20  
21  
22  
23  
24  
25  
26  
27  
28  
29  
30  
31  
32  
33  
34  
35  
36  
37  
38  
39  
40  
41  
42  
43  
44  
45  
46  
47  
48  
49  
50  
51  
52  
53  
54  
55  
56  
57  
58  
59  
60

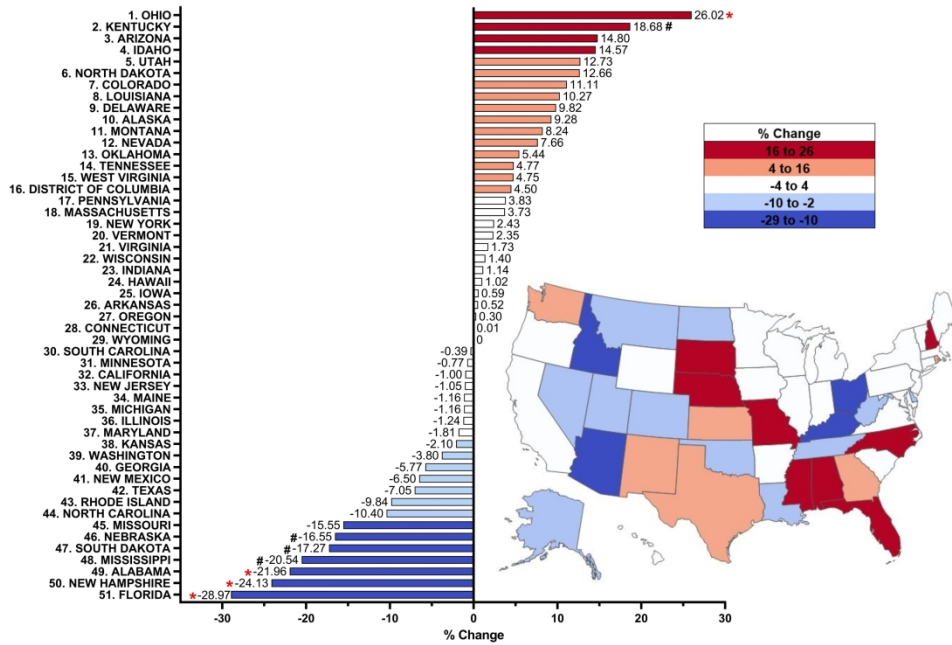

Percent change from 2019 to 2020 in methadone distribution as reported by the Drug Enforcement Administration’s Automated Reports and Consolidated Ordering System for Opioid Use Disorder. Percent change between 1.5 SDs and 1.959 SDs from the mean (-0.09%, SD 10.81), indicated with a #. Percent change  $\geq \pm 1.96$  SD from the mean was considered significant (\*P < 0.05).

142x101mm (600 x 600 DPI)

1  
2  
3  
4  
5  
6  
7  
8  
9  
10  
11  
12  
13  
14  
15  
16  
17  
18  
19  
20  
21  
22  
23  
24  
25  
26  
27  
28  
29  
30  
31  
32  
33  
34  
35  
36  
37  
38  
39  
40  
41  
42  
43  
44  
45  
46  
47  
48  
49  
50  
51  
52  
53  
54  
55  
56  
57  
58  
59  
60

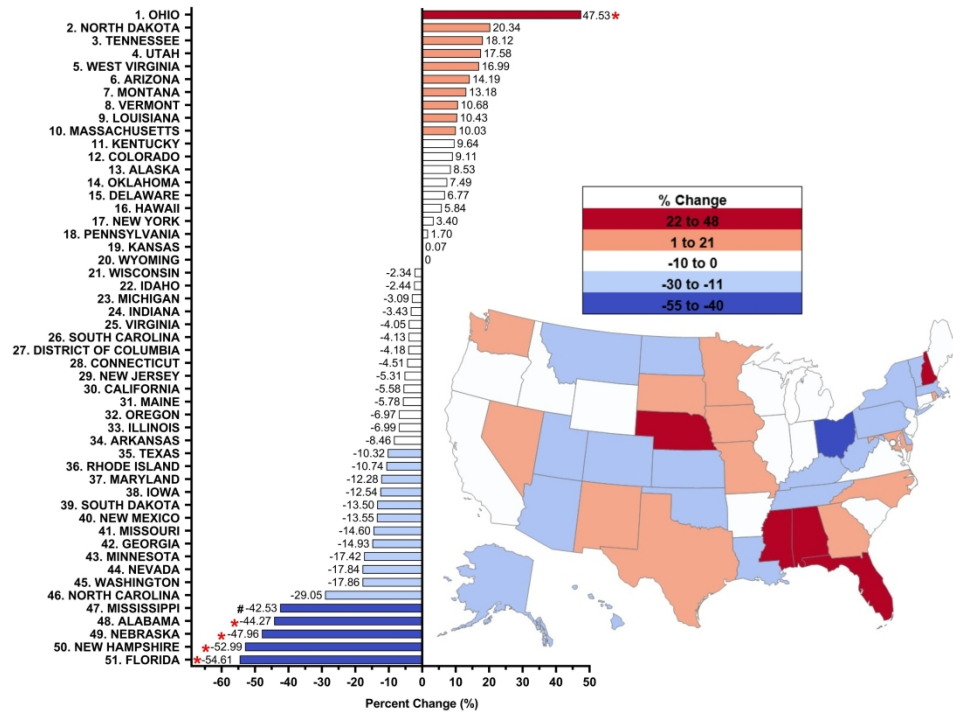

Percent change from 2019 to 2021 in methadone distribution as reported by the Drug Enforcement Administration's Automated Reports and Consolidated Ordering System for Opioid Use Disorder. Percent change between 1.5 SDs and 1.959 SDs from the mean (-5.15%, SD 19.14), indicated with a #. Percent change > ±1.96 SD from the mean was considered significant (\*P < 0.05).

139x105mm (600 x 600 DPI)

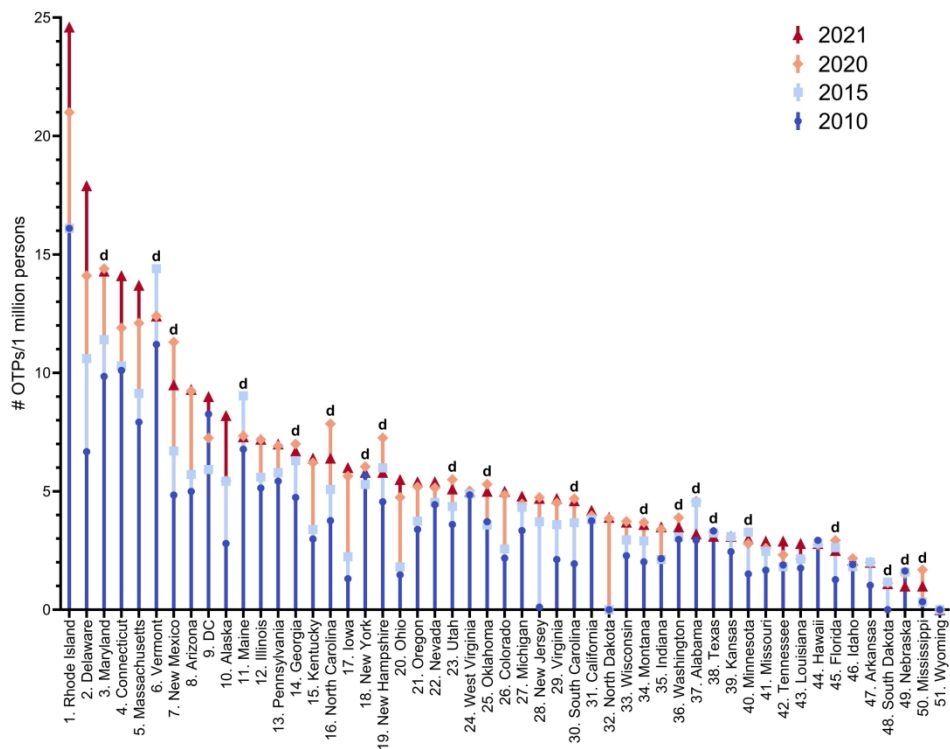

Number of opioid treatment programs per 1 million persons per state all significantly ( $P < 0.0001$ ) different from 2010, 2015, 2020 and 2021. The twenty states that decreased in 2021 relative to 2010, 2015 or 2020 are indicated with a "d". DC: District of Columbia.

121x97mm (600 x 600 DPI)

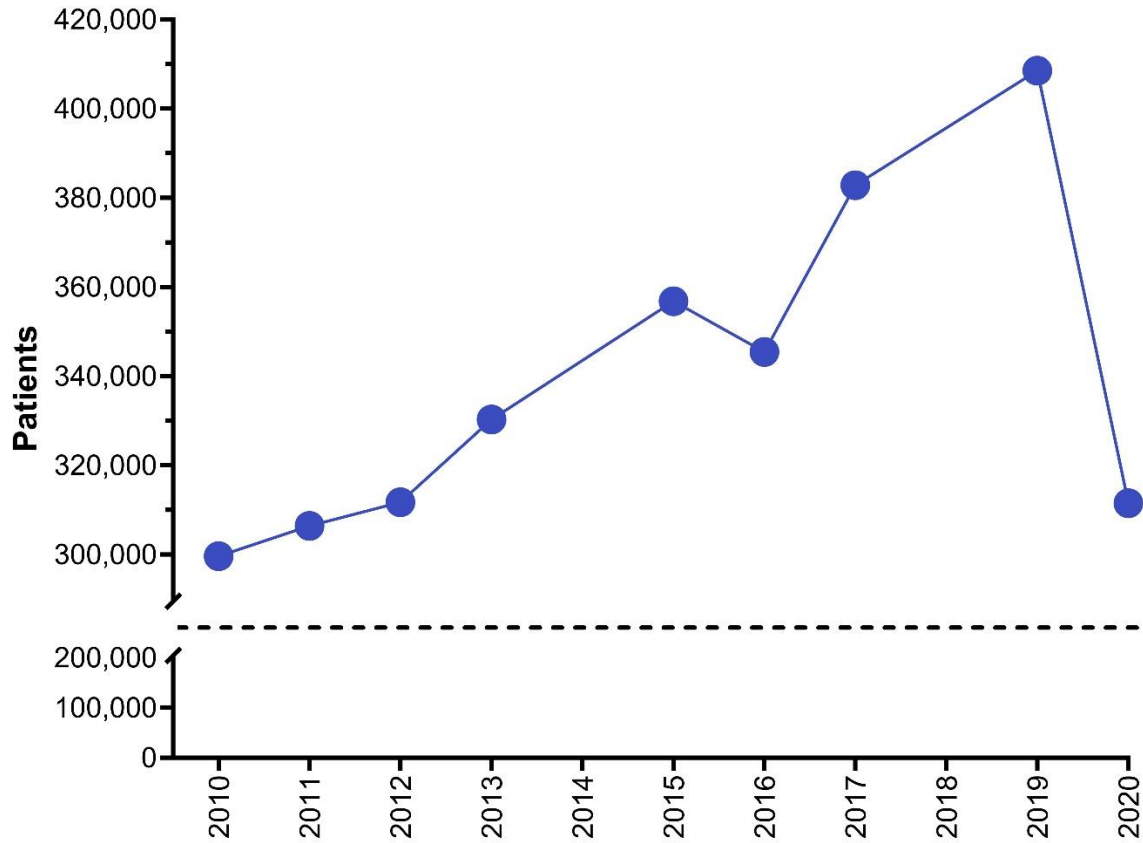

**Supplemental Figure 1.** Number of patients receiving methadone for opioid use disorder in the United States per year as reported by Substance Abuse and Mental Health Services Administration's National Survey of Substance Abuse Treatment Services data. The years 2014 and 2018 were not available and were omitted.



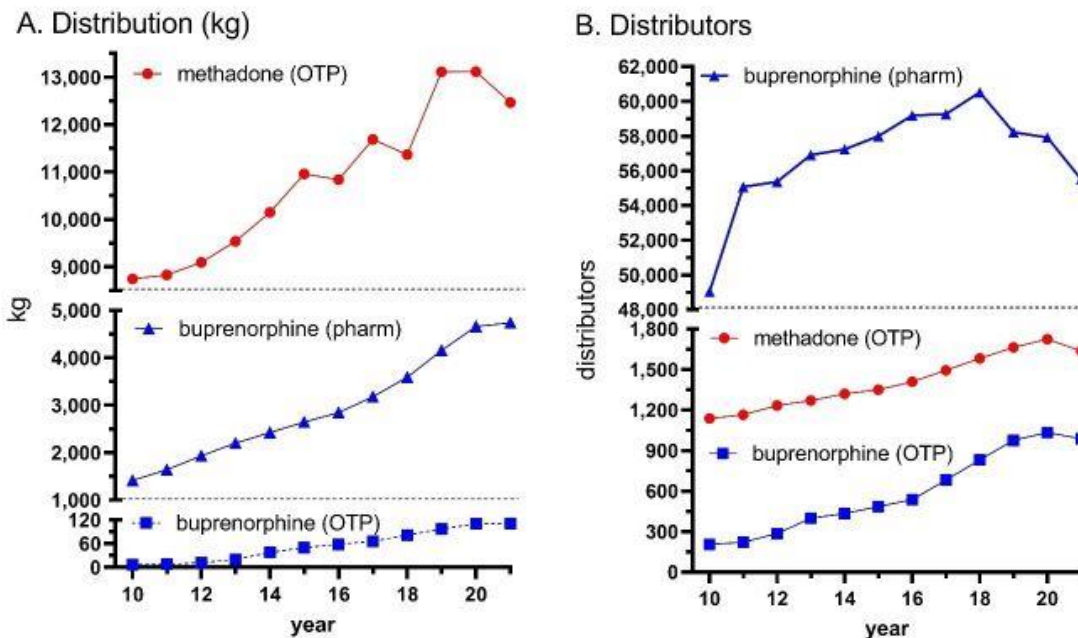

**Supplemental Figure 2.** Distribution in kg (A) and number of buyers and registrants (B) in Opioid Treatment Programs (OTP) and pharmacies (pharm, buprenorphine only) for methadone and buprenorphine as reported to the United States Drug Enforcement Administration's Automated Reports and Consolidated Orders system for the fifty states, Washington DC, and the US Territories. Methadone in 2021 (12.4 metric tons) was 5.69% lower than 2019 (13.1 metric tons) and 5.71% below 2020 (13.1 metric tons). Methadone by weight was 2.49-fold greater than buprenorphine from pharmacies and OTPs in 2021. The number of pharmacies distributing buprenorphine was 33.3 to 47.3-fold greater than the number of OTPs distributing methadone from 2010 to 2021.

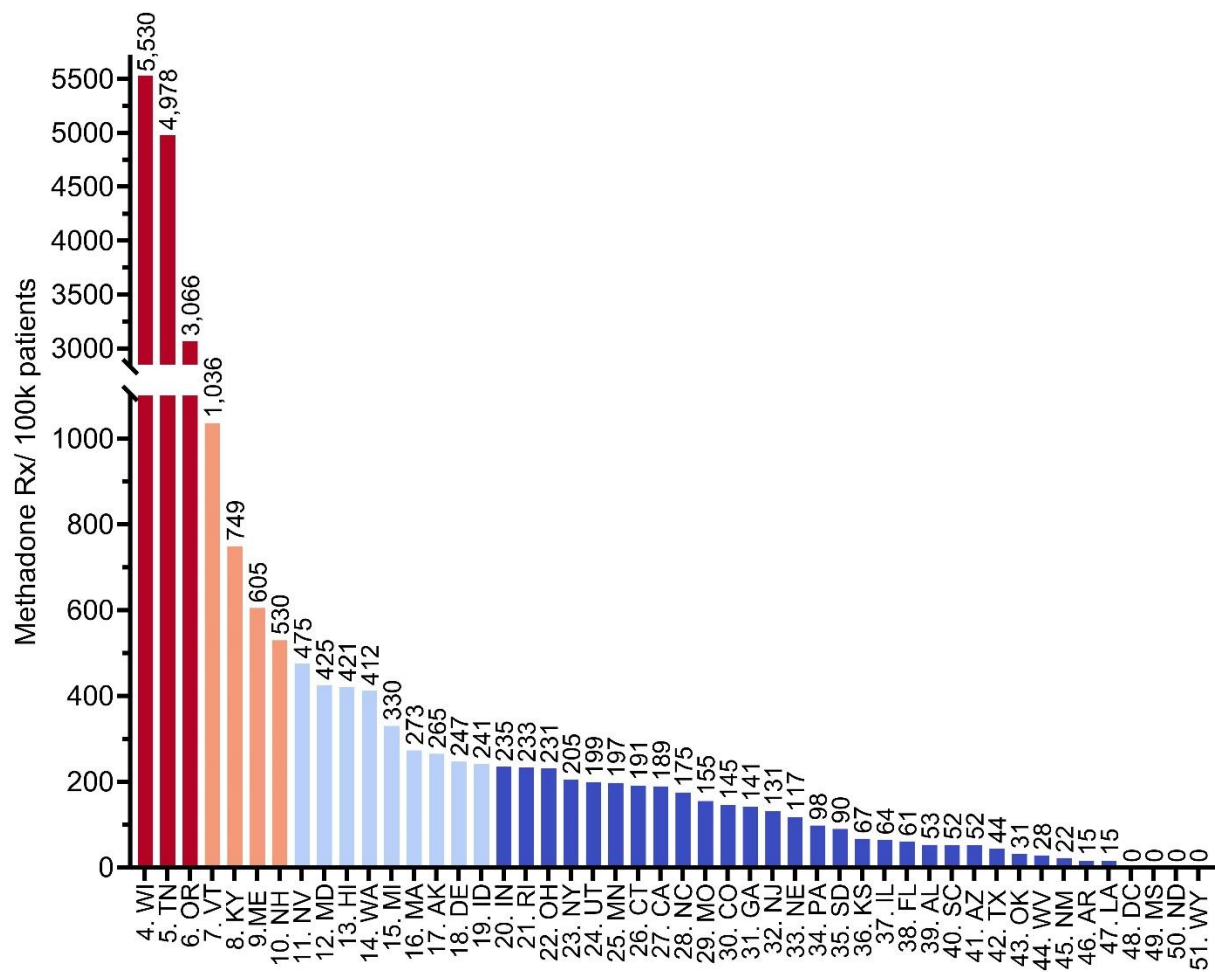

**Supplemental Figure 3.** Methadone prescriptions, per 100K Medicaid patients, for 48 US states, and Washington DC.

**Supplemental Table 1.** Comparison of the pharmacological and therapeutic properties of methadone and buprenorphine.

|                                       | <b>Methadone</b>                          | <b>Buprenorphine</b>                                                          |
|---------------------------------------|-------------------------------------------|-------------------------------------------------------------------------------|
| Year developed                        | 1937                                      | 1969                                                                          |
| Opioid receptor activity              | mu full-agonist                           | mu partial agonist                                                            |
| Other mechanism(s)                    | NMDA antagonist                           | non-selective for other opioid receptors                                      |
| Potency (x morphine)                  | 8 – 12                                    | 10                                                                            |
| Metabolism                            | CYP2D6, CYP3A4                            | CYP3A4                                                                        |
| Active metabolite(s)                  | none                                      | norbuprenorphine                                                              |
| Half-life                             | 8 – 59 hours for oral                     | 24 – 48 hours for buccal                                                      |
| Formulation                           | mono                                      | mono or combination with naloxone                                             |
| Present in breast milk                | yes, < 3% maternal dose                   | yes, < 1% maternal dose                                                       |
| Availability (US)                     | narcotic treatment programs               | providers with an X-waiver                                                    |
| Schedule (US)                         | II                                        | III                                                                           |
| Crowdsourc (price/mg)                 | \$0.96                                    | \$2.13                                                                        |
| Black box warnings                    | addiction, abuse, misuse, QT prolongation | addiction, abuse, misuse <sup>1</sup> , child exposure can result in overdose |
| Opioid rank                           | #1                                        | #4                                                                            |
| 2021 Distribution (US)                | 12.4 metric tons <sup>3</sup>             | 5.2 metric tons <sup>4</sup>                                                  |
| WHO Essential Medication <sup>2</sup> | Yes                                       | yes                                                                           |

<sup>1</sup>buccal formulation; <sup>2</sup>complimentary; <sup>3</sup>Opioid Treatment Programs (OTP); <sup>4</sup>total of pharmacies, hospitals, and OTP.

**Supplementary Table 2.** Medicaid's State Drug Utilization Data reported National Drug Codes (NDC) for methadone prescribed for opioid use disorder.

| <b>NDC</b>  |
|-------------|
| 54039168    |
| 54039268    |
| 54355344    |
| 54355563    |
| 54421825    |
| 54421925    |
| 54453825    |
| 54457025    |
| 54457125    |
| 54855324    |
| 54855424    |
| 406052710   |
| 406054034   |
| 406254001   |
| 406575501   |
| 406575523   |
| 406575562   |
| 406577101   |
| 406577123   |
| 406577162   |
| 406872510   |
| 904653061   |
| 13107000000 |
| 17478000000 |
| 31722000000 |

1  
2  
3 42806000000  
4

5 60687000000  
6

7 63739000000  
8

9 66689000000  
10

11 67457000000  
12

13 67877000000  
14

15 68084000000  
16

17 68462000000  
18

---

19  
20  
21  
22  
23  
24  
25  
26  
27  
28  
29  
30  
31  
32  
33  
34  
35  
36  
37  
38  
39  
40  
41  
42  
43  
44  
45  
46  
47  
48  
49  
50  
51  
52  
53  
54  
55  
56  
57  
58  
59  
60

For peer review only

**Supplemental Table 3.** Opioid treatment programs as reported to the Drug Enforcement Administration's Automated Reports and Consolidated Orders System per one million persons.

| State              | 2010 | 2015 | 2020 | 2021 |
|--------------------|------|------|------|------|
| 1. Rhode Island    | 16.1 | 16.1 | 21.0 | 24.6 |
| 2. Delaware        | 6.7  | 10.6 | 14.1 | 17.9 |
| 3. Maryland        | 9.9  | 11.4 | 14.4 | 14.3 |
| 4. Connecticut     | 10.1 | 10.3 | 11.9 | 14.1 |
| 5. Massachusetts   | 7.9  | 9.1  | 12.1 | 13.7 |
| 6. Vermont         | 11.2 | 14.4 | 12.4 | 12.4 |
| 7. New Mexico      | 4.8  | 6.7  | 11.3 | 9.5  |
| 8. Arizona         | 5.0  | 5.7  | 9.2  | 9.3  |
| 9. DC              | 8.3  | 5.9  | 7.3  | 9.0  |
| 10. Alaska         | 2.8  | 5.4  | 5.5  | 8.2  |
| 11. Maine          | 6.8  | 9.0  | 7.3  | 7.3  |
| 12. Illinois       | 5.1  | 5.6  | 7.2  | 7.2  |
| 13. Pennsylvania   | 5.4  | 5.8  | 6.9  | 7.0  |
| 14. Georgia        | 4.7  | 6.3  | 7.0  | 6.7  |
| 15. Kentucky       | 3.0  | 3.4  | 6.2  | 6.4  |
| 16. North Carolina | 3.8  | 5.1  | 7.9  | 6.4  |
| 17. Iowa           | 1.3  | 2.2  | 5.6  | 6.0  |
| 18. New York       | 5.7  | 5.3  | 6.0  | 5.8  |
| 19. New Hampshire  | 4.6  | 6.0  | 7.3  | 5.8  |
| 20. Ohio           | 1.5  | 1.8  | 4.8  | 5.5  |
| 21. Oregon         | 3.4  | 3.7  | 5.2  | 5.4  |
| 22. Nevada         | 4.4  | 4.5  | 5.2  | 5.4  |
| 23. Utah           | 3.6  | 4.4  | 5.5  | 5.1  |
| 24. West Virginia  | 4.9  | 4.9  | 5.0  | 5.0  |
| 25. Oklahoma       | 3.7  | 3.6  | 5.3  | 5.0  |
| 26. Colorado       | 2.2  | 2.6  | 4.9  | 5.0  |
| 27. Michigan       | 3.3  | 4.3  | 4.5  | 4.8  |
| 28. New Jersey     | 0.11 | 3.7  | 4.7  | 4.7  |
| 29. Virginia       | 2.1  | 3.6  | 4.5  | 4.7  |
| 30. South Carolina | 1.9  | 3.7  | 4.7  | 4.6  |
| 31. California     | 3.8  | 3.8  | 4.0  | 4.2  |
| 32. North Dakota   | 0.0  | 0.0  | 3.8  | 3.9  |
| 33. Wisconsin      | 2.3  | 3.0  | 3.7  | 3.7  |
| 34. Montana        | 2.0  | 2.9  | 3.7  | 3.6  |
| 35. Indiana        | 2.2  | 2.1  | 3.4  | 3.5  |
| 36. Washington     | 3.0  | 3.0  | 3.9  | 3.5  |
| 37. Alabama        | 2.9  | 4.5  | 4.6  | 3.2  |
| 38. Texas          | 3.3  | 3.2  | 3.3  | 3.1  |
| 39. Kansas         | 2.5  | 3.1  | 3.1  | 3.1  |
| 40. Minnesota      | 1.5  | 3.3  | 2.8  | 3.0  |
| 41. Missouri       | 1.7  | 2.5  | 2.6  | 2.9  |

|                  |            |            |            |            |
|------------------|------------|------------|------------|------------|
| 42. Tennessee    | 1.9        | 1.8        | 2.3        | 2.9        |
| 43. Louisiana    | 1.8        | 2.1        | 2.2        | 2.8        |
| 44. Hawaii       | 2.9        | 2.8        | 2.8        | 2.8        |
| 45. Florida      | 1.3        | 2.6        | 2.9        | 2.5        |
| 46. Idaho        | 1.9        | 1.8        | 2.2        | 2.1        |
| 47. Arkansas     | 1.0        | 2.0        | 2.0        | 2.0        |
| 48. South Dakota | 0.0        | 1.2        | 1.1        | 1.1        |
| 49. Nebraska     | 1.6        | 1.6        | 1.5        | 1.0        |
| 50. Mississippi  | 0.3        | 0.3        | 1.7        | 1.0        |
| 51. Wyoming      | 0.0        | 0.0        | 0.0        | 0.0        |
| <b>Mean</b>      | <b>3.8</b> | <b>4.6</b> | <b>5.7</b> | <b>5.9</b> |
| <b>SEM</b>       | <b>0.4</b> | <b>0.5</b> | <b>0.6</b> | <b>0.6</b> |

**STROBE 2007 (v4) checklist of items to be included in reports of observational studies in epidemiology\***  
**Checklist for cohort, case-control, and cross-sectional studies (combined)**

| Section/Topic             | Item # | Recommendation                                                                                                                                                                                                                                                                                                                                                                                                                                                         | Reported on page # |
|---------------------------|--------|------------------------------------------------------------------------------------------------------------------------------------------------------------------------------------------------------------------------------------------------------------------------------------------------------------------------------------------------------------------------------------------------------------------------------------------------------------------------|--------------------|
| Title and abstract        | 1      | (a) Indicate the study's design with a commonly used term in the title or the abstract                                                                                                                                                                                                                                                                                                                                                                                 | 1                  |
|                           |        | (b) Provide in the abstract an informative and balanced summary of what was done and what was found                                                                                                                                                                                                                                                                                                                                                                    | 2                  |
| <b>Introduction</b>       |        |                                                                                                                                                                                                                                                                                                                                                                                                                                                                        |                    |
| Background/rationale      | 2      | Explain the scientific background and rationale for the investigation being reported                                                                                                                                                                                                                                                                                                                                                                                   | 4                  |
| Objectives                | 3      | State specific objectives, including any pre-specified hypotheses                                                                                                                                                                                                                                                                                                                                                                                                      | 5                  |
| <b>Methods</b>            |        |                                                                                                                                                                                                                                                                                                                                                                                                                                                                        |                    |
| Study design              | 4      | Present key elements of study design early in the paper                                                                                                                                                                                                                                                                                                                                                                                                                | 6                  |
| Setting                   | 5      | Describe the setting, locations, and relevant dates, including periods of recruitment, exposure, follow-up, and data collection                                                                                                                                                                                                                                                                                                                                        | 6                  |
| Participants              | 6      | (a) <i>Cohort study</i> —Give the eligibility criteria, and the sources and methods of selection of participants. Describe methods of follow-up<br><i>Case-control study</i> —Give the eligibility criteria, and the sources and methods of case ascertainment and control selection. Give the rationale for the choice of cases and controls<br><i>Cross-sectional study</i> —Give the eligibility criteria, and the sources and methods of selection of participants | 6                  |
|                           |        | (b) <i>Cohort study</i> —For matched studies, give matching criteria and number of exposed and unexposed<br><i>Case-control study</i> —For matched studies, give matching criteria and the number of controls per case                                                                                                                                                                                                                                                 | 6                  |
| Variables                 | 7      | Clearly define all outcomes, exposures, predictors, potential confounders, and effect modifiers. Give diagnostic criteria, if applicable                                                                                                                                                                                                                                                                                                                               | 6                  |
| Data sources/ measurement | 8*     | For each variable of interest, give sources of data and details of methods of assessment (measurement). Describe comparability of assessment methods if there is more than one group                                                                                                                                                                                                                                                                                   | 6                  |
| Bias                      | 9      | Describe any efforts to address potential sources of bias                                                                                                                                                                                                                                                                                                                                                                                                              | 6                  |
| Study size                | 10     | Explain how the study size was arrived at                                                                                                                                                                                                                                                                                                                                                                                                                              | 6                  |
| Quantitative variables    | 11     | Explain how quantitative variables were handled in the analyses. If applicable, describe which groupings were chosen and why                                                                                                                                                                                                                                                                                                                                           | 6                  |
| Statistical methods       | 12     | (a) Describe all statistical methods, including those used to control for confounding                                                                                                                                                                                                                                                                                                                                                                                  | 6                  |
|                           |        | (b) Describe any methods used to examine subgroups and interactions                                                                                                                                                                                                                                                                                                                                                                                                    | 6                  |
|                           |        | (c) Explain how missing data were addressed                                                                                                                                                                                                                                                                                                                                                                                                                            | 6                  |
|                           |        | (d) <i>Cohort study</i> —If applicable, explain how loss to follow-up was addressed<br><i>Case-control study</i> —If applicable, explain how matching of cases and controls was addressed                                                                                                                                                                                                                                                                              | 6                  |



|                          |     |                                                                                                                                                                                                              |           |
|--------------------------|-----|--------------------------------------------------------------------------------------------------------------------------------------------------------------------------------------------------------------|-----------|
|                          |     | <i>Cross-sectional study</i> —If applicable, describe analytical methods taking account of sampling strategy                                                                                                 |           |
|                          |     | (e) Describe any sensitivity analyses                                                                                                                                                                        | 6         |
| <b>Results</b>           |     |                                                                                                                                                                                                              |           |
| Participants             | 13* | (a) Report numbers of individuals at each stage of study—eg numbers potentially eligible, examined for eligibility, confirmed eligible, included in the study, completing follow-up, and analysed            | 6         |
|                          |     | (b) Give reasons for non-participation at each stage                                                                                                                                                         | 6         |
|                          |     | (c) Consider use of a flow diagram                                                                                                                                                                           | 6         |
| Descriptive data         | 14* | (a) Give characteristics of study participants (eg demographic, clinical, social) and information on exposures and potential confounders                                                                     | 6         |
|                          |     | (b) Indicate number of participants with missing data for each variable of interest                                                                                                                          | 6         |
|                          |     | (c) <i>Cohort study</i> —Summarise follow-up time (eg, average and total amount)                                                                                                                             | 6         |
| Outcome data             | 15* | <i>Cohort study</i> —Report numbers of outcome events or summary measures over time                                                                                                                          | 7         |
|                          |     | <i>Case-control study</i> —Report numbers in each exposure category, or summary measures of exposure                                                                                                         | 7         |
|                          |     | <i>Cross-sectional study</i> —Report numbers of outcome events or summary measures                                                                                                                           | 7         |
| Main results             | 16  | (a) Give unadjusted estimates and, if applicable, confounder-adjusted estimates and their precision (eg, 95% confidence interval). Make clear which confounders were adjusted for and why they were included | 7         |
|                          |     | (b) Report category boundaries when continuous variables were categorized                                                                                                                                    | 7         |
|                          |     | (c) If relevant, consider translating estimates of relative risk into absolute risk for a meaningful time period                                                                                             | 7         |
| Other analyses           | 17  | Report other analyses done—eg analyses of subgroups and interactions, and sensitivity analyses                                                                                                               | 7, 8      |
| <b>Discussion</b>        |     |                                                                                                                                                                                                              |           |
| Key results              | 18  | Summarise key results with reference to study objectives                                                                                                                                                     | 8         |
| Limitations              | 19  | Discuss limitations of the study, taking into account sources of potential bias or imprecision. Discuss both direction and magnitude of any potential bias                                                   | 10        |
| Interpretation           | 20  | Give a cautious overall interpretation of results considering objectives, limitations, multiplicity of analyses, results from similar studies, and other relevant evidence                                   | 9         |
| Generalisability         | 21  | Discuss the generalisability (external validity) of the study results                                                                                                                                        | 9, 10, 11 |
| <b>Other information</b> |     |                                                                                                                                                                                                              |           |
| Funding                  | 22  | Give the source of funding and the role of the funders for the present study and, if applicable, for the original study on which the present article is based                                                | 3         |

\*Give information separately for cases and controls in case-control studies and, if applicable, for exposed and unexposed groups in cohort and cross-sectional studies.

**Note:** An Explanation and Elaboration article discusses each checklist item and gives methodological background and published examples of transparent reporting. The STROBE checklist is best used in conjunction with this article (freely available on the Web sites of PLoS Medicine at <http://www.plosmedicine.org/>, Annals of Internal Medicine at <http://www.annals.org/>, and Epidemiology at <http://www.epidem.com/>). Information on the STROBE Initiative is available at [www.strobe-statement.org](http://www.strobe-statement.org).
