# Supplementary material for: Dynamic changes in methadone utilisation for opioid use disorder treatment: a retrospective observational study during the COVID-19 pandemic
Source: PubMed Central journal article supplement — BMJ Open. 2023 Nov 16;13(11):e074845. doi: 10.1136/bmjopen-2023-074845 (PMC10661065; doi:10.1136/bmjopen-2023-074845), 2023-11-16
Supplement: bmjopen-2023-074845supp001.pdf [file bmjopen-2023-074845supp001.pdf]

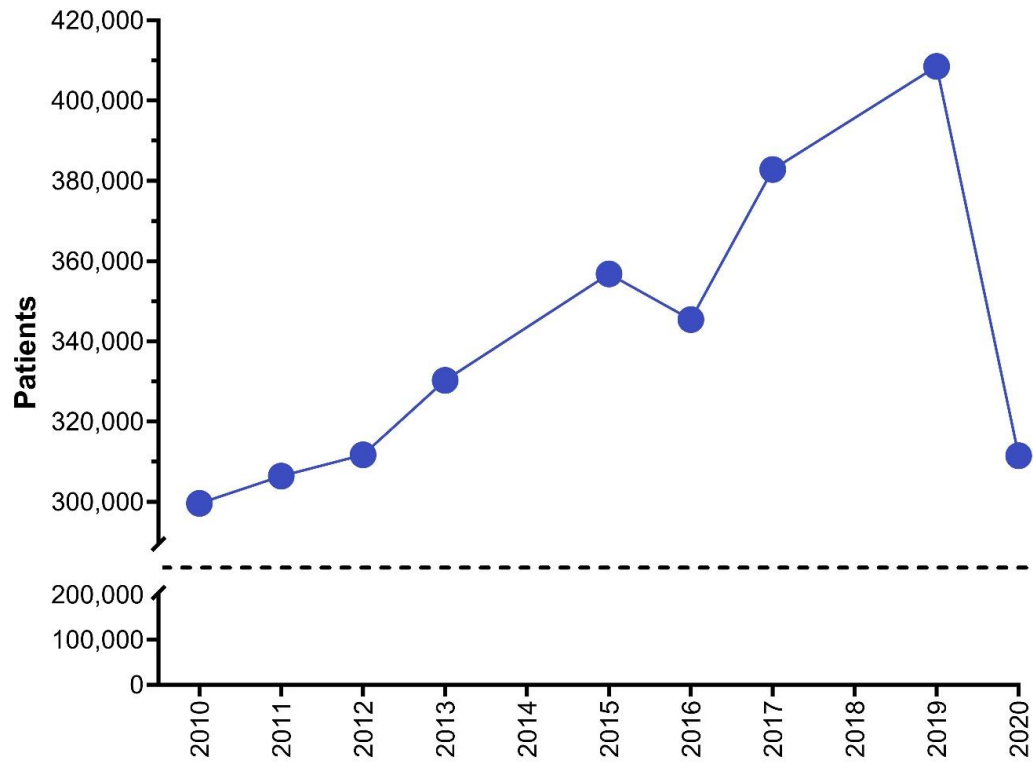

**Supplemental Figure 1.** Number of patients receiving methadone for opioid use disorder in the United States per year as reported by Substance Abuse and Mental Health Services Administration's National Survey of Substance Abuse Treatment Services data. The years 2014 and 2018 were not available and were omitted.

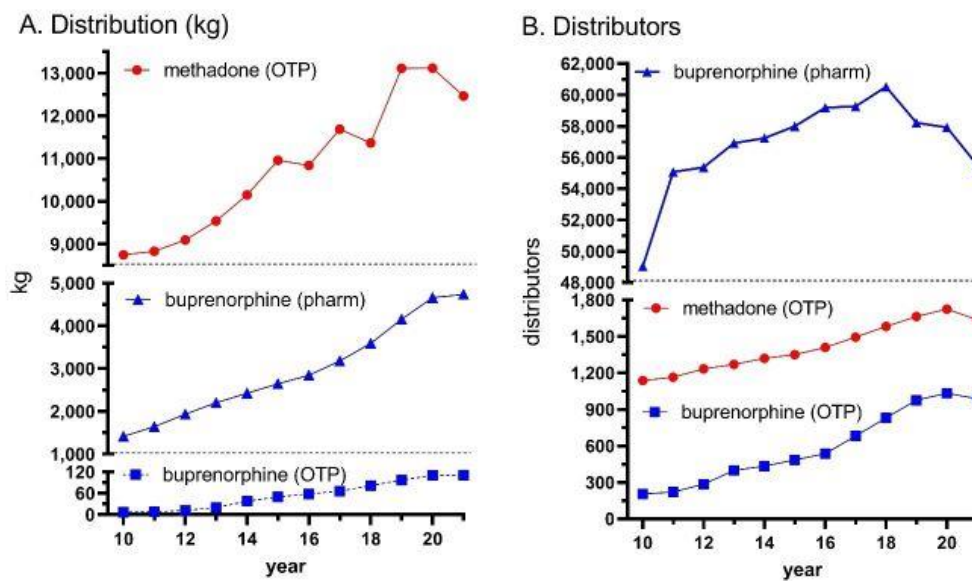

**Supplemental Figure 2.** Distribution in kg (A) and number of buyers and registrants (B) in Opioid Treatment Programs (OTP) and pharmacies (pharm, buprenorphine only) for methadone and buprenorphine as reported to the United States Drug Enforcement Administration's Automated Reports and Consolidated Orders system for the fifty states, Washington DC, and the US Territories. Methadone in 2021 (12.4 metric tons) was 5.69% lower than 2019 (13.1 metric tons) and 5.71% below 2020 (13.1 metric tons). Methadone by weight was 2.49-fold greater than buprenorphine from pharmacies and OTPs in 2021. The number of pharmacies distributing buprenorphine was 33.3 to 47.3-fold greater than the number of OTPs distributing methadone from 2010 to 2021.

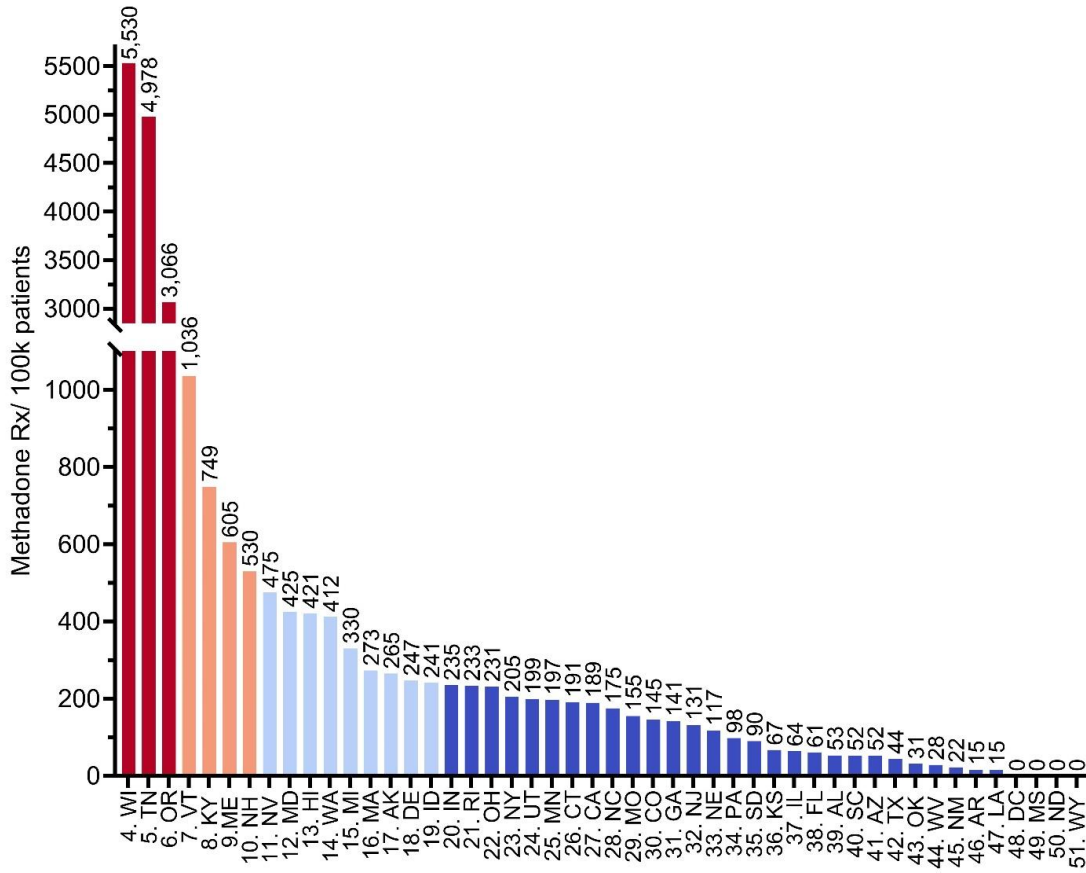

**Supplemental Figure 3.** Methadone prescriptions, per 100K Medicaid patients, for 48 US states, and Washington DC.

**Supplemental Table 1.** Comparison of the pharmacological and therapeutic properties of methadone and buprenorphine.

|                                       | <b>Methadone</b>                          | <b>Buprenorphine</b>                                                          |
|---------------------------------------|-------------------------------------------|-------------------------------------------------------------------------------|
| Year developed                        | 1937                                      | 1969                                                                          |
| Opioid receptor activity              | mu full-agonist                           | mu partial agonist                                                            |
| Other mechanism(s)                    | NMDA antagonist                           | non-selective for other opioid receptors                                      |
| Potency (x morphine)                  | 8 – 12                                    | 10                                                                            |
| Metabolism                            | CYP2D6, CYP3A4                            | CYP3A4                                                                        |
| Active metabolite(s)                  | none                                      | norbuprenorphine                                                              |
| Half-life                             | 8 – 59 hours for oral                     | 24 – 48 hours for buccal                                                      |
| Formulation                           | mono                                      | mono or combination with naloxone                                             |
| Present in breast milk                | yes, < 3% maternal dose                   | yes, < 1% maternal dose                                                       |
| Availability (US)                     | narcotic treatment programs               | providers with an X-waiver                                                    |
| Schedule (US)                         | II                                        | III                                                                           |
| Crowdsourc (price/mg)                 | \$0.96                                    | \$2.13                                                                        |
| Black box warnings                    | addiction, abuse, misuse, QT prolongation | addiction, abuse, misuse <sup>1</sup> , child exposure can result in overdose |
| Opioid rank                           | #1                                        | #4                                                                            |
| 2021 Distribution (US)                | 12.4 metric tons <sup>3</sup>             | 5.2 metric tons <sup>4</sup>                                                  |
| WHO Essential Medication <sup>2</sup> | Yes                                       | yes                                                                           |

<sup>1</sup>buccal formulation; <sup>2</sup>complimentary; <sup>3</sup>Opioid Treatment Programs (OTP); <sup>4</sup>total of pharmacies, hospitals, and OTP.

**Supplementary Table 2.** Medicaid's State Drug Utilization Data reported National Drug Codes (NDC) for methadone prescribed for opioid use disorder.

| <b>NDC</b>  |
|-------------|
| 54039168    |
| 54039268    |
| 54355344    |
| 54355563    |
| 54421825    |
| 54421925    |
| 54453825    |
| 54457025    |
| 54457125    |
| 54855324    |
| 54855424    |
| 406052710   |
| 406054034   |
| 406254001   |
| 406575501   |
| 406575523   |
| 406575562   |
| 406577101   |
| 406577123   |
| 406577162   |
| 406872510   |
| 904653061   |
| 13107000000 |
| 17478000000 |
| 31722000000 |

42806000000

60687000000

63739000000

66689000000

67457000000

67877000000

68084000000

68462000000

---

**Supplemental Table 3.** Opioid treatment programs as reported to the Drug Enforcement Administration's Automated Reports and Consolidated Orders System per one million persons.

| State              | 2010 | 2015 | 2020 | 2021 |
|--------------------|------|------|------|------|
| 1. Rhode Island    | 16.1 | 16.1 | 21.0 | 24.6 |
| 2. Delaware        | 6.7  | 10.6 | 14.1 | 17.9 |
| 3. Maryland        | 9.9  | 11.4 | 14.4 | 14.3 |
| 4. Connecticut     | 10.1 | 10.3 | 11.9 | 14.1 |
| 5. Massachusetts   | 7.9  | 9.1  | 12.1 | 13.7 |
| 6. Vermont         | 11.2 | 14.4 | 12.4 | 12.4 |
| 7. New Mexico      | 4.8  | 6.7  | 11.3 | 9.5  |
| 8. Arizona         | 5.0  | 5.7  | 9.2  | 9.3  |
| 9. DC              | 8.3  | 5.9  | 7.3  | 9.0  |
| 10. Alaska         | 2.8  | 5.4  | 5.5  | 8.2  |
| 11. Maine          | 6.8  | 9.0  | 7.3  | 7.3  |
| 12. Illinois       | 5.1  | 5.6  | 7.2  | 7.2  |
| 13. Pennsylvania   | 5.4  | 5.8  | 6.9  | 7.0  |
| 14. Georgia        | 4.7  | 6.3  | 7.0  | 6.7  |
| 15. Kentucky       | 3.0  | 3.4  | 6.2  | 6.4  |
| 16. North Carolina | 3.8  | 5.1  | 7.9  | 6.4  |
| 17. Iowa           | 1.3  | 2.2  | 5.6  | 6.0  |
| 18. New York       | 5.7  | 5.3  | 6.0  | 5.8  |
| 19. New Hampshire  | 4.6  | 6.0  | 7.3  | 5.8  |
| 20. Ohio           | 1.5  | 1.8  | 4.8  | 5.5  |
| 21. Oregon         | 3.4  | 3.7  | 5.2  | 5.4  |
| 22. Nevada         | 4.4  | 4.5  | 5.2  | 5.4  |
| 23. Utah           | 3.6  | 4.4  | 5.5  | 5.1  |
| 24. West Virginia  | 4.9  | 4.9  | 5.0  | 5.0  |
| 25. Oklahoma       | 3.7  | 3.6  | 5.3  | 5.0  |
| 26. Colorado       | 2.2  | 2.6  | 4.9  | 5.0  |
| 27. Michigan       | 3.3  | 4.3  | 4.5  | 4.8  |
| 28. New Jersey     | 0.11 | 3.7  | 4.7  | 4.7  |
| 29. Virginia       | 2.1  | 3.6  | 4.5  | 4.7  |
| 30. South Carolina | 1.9  | 3.7  | 4.7  | 4.6  |
| 31. California     | 3.8  | 3.8  | 4.0  | 4.2  |
| 32. North Dakota   | 0.0  | 0.0  | 3.8  | 3.9  |
| 33. Wisconsin      | 2.3  | 3.0  | 3.7  | 3.7  |
| 34. Montana        | 2.0  | 2.9  | 3.7  | 3.6  |
| 35. Indiana        | 2.2  | 2.1  | 3.4  | 3.5  |
| 36. Washington     | 3.0  | 3.0  | 3.9  | 3.5  |
| 37. Alabama        | 2.9  | 4.5  | 4.6  | 3.2  |
| 38. Texas          | 3.3  | 3.2  | 3.3  | 3.1  |
| 39. Kansas         | 2.5  | 3.1  | 3.1  | 3.1  |
| 40. Minnesota      | 1.5  | 3.3  | 2.8  | 3.0  |
| 41. Missouri       | 1.7  | 2.5  | 2.6  | 2.9  |

---

|                  |            |            |            |            |
|------------------|------------|------------|------------|------------|
| 42. Tennessee    | 1.9        | 1.8        | 2.3        | 2.9        |
| 43. Louisiana    | 1.8        | 2.1        | 2.2        | 2.8        |
| 44. Hawaii       | 2.9        | 2.8        | 2.8        | 2.8        |
| 45. Florida      | 1.3        | 2.6        | 2.9        | 2.5        |
| 46. Idaho        | 1.9        | 1.8        | 2.2        | 2.1        |
| 47. Arkansas     | 1.0        | 2.0        | 2.0        | 2.0        |
| 48. South Dakota | 0.0        | 1.2        | 1.1        | 1.1        |
| 49. Nebraska     | 1.6        | 1.6        | 1.5        | 1.0        |
| 50. Mississippi  | 0.3        | 0.3        | 1.7        | 1.0        |
| 51. Wyoming      | 0.0        | 0.0        | 0.0        | 0.0        |
| <b>Mean</b>      | <b>3.8</b> | <b>4.6</b> | <b>5.7</b> | <b>5.9</b> |
| <b>SEM</b>       | <b>0.4</b> | <b>0.5</b> | <b>0.6</b> | <b>0.6</b> |

---
